# Supplementary material for: The gut microbiome of the Sunda pangolin (Manis javanica) reveals its adaptation to specialized myrmecophagy
Source: PeerJ journal article supplement (doi:10.7717/peerj.11490), 2021-06-02
Supplement: Supplementary_Table_S1.xlsx [file Supplementary_Table_S1.xlsx]

## Sheet: Sheet1
Table S1 Information and basic statistics on the 56 mammalian samples.
Sample ID	Host scientific name	Host common name	Diet	Region	Platform	Source
FS-02A	Manis javanica	Sunda pangolin	Myrmecophages	V3 and V4	Illumina	This study
FS-06A	Manis javanica	Sunda pangolin	Myrmecophages	V3 and V4	Illumina	This study
FS-06B	Manis javanica	Sunda pangolin	Myrmecophages	V3 and V4	Illumina	This study
FS-06BF	Manis javanica	Sunda pangolin	Myrmecophages	V3 and V4	Illumina	This study
FS-15M	Manis javanica	Sunda pangolin	Myrmecophages	V3 and V4	Illumina	This study
FS-16	Manis javanica	Sunda pangolin	Myrmecophages	V3 and V4	Illumina	This study
FS-18	Manis javanica	Sunda pangolin	Myrmecophages	V3 and V4	Illumina	This study
FS-18A	Manis javanica	Sunda pangolin	Myrmecophages	V3 and V4	Illumina	This study
FS-18B	Manis javanica	Sunda pangolin	Myrmecophages	V3 and V4	Illumina	This study
Myr.tri.Mont.1.1.653732	Myrmecophaga tridactyla	Giant anteater	Myrmecophages	V4	Illumina	Delsuc et al. 2014
Myr.tri.Mont.2.0.653718	Myrmecophaga tridactyla	Giant anteater	Myrmecophages	V4	Illumina	Delsuc et al. 2014
Myr.tri.Mont.2.1.653695	Myrmecophaga tridactyla	Giant anteater	Myrmecophages	V4	Illumina	Delsuc et al. 2014
Ory.afe.Cinci.1.653709	Orycteropus afer	Aardvark	Myrmecophages	V4	Illumina	Delsuc et al. 2014
Ory.afe.Colch.8.653708	Orycteropus afer	Aardvark	Myrmecophages	V4	Illumina	Delsuc et al. 2014
Ory.afe.Lond.1.653689	Orycteropus afer	Aardvark	Myrmecophages	V4	Illumina	Delsuc et al. 2014
Pri.max.Seat.2.02V07.653697	Priodontes maximus	Giant armadillo	Myrmecophages	V4	Illumina	Delsuc et al. 2014
Pri.max.Seat.2.13B02.653663	Priodontes maximus	Giant armadillo	Myrmecophages	V4	Illumina	Delsuc et al. 2014
Pro.cri.Cinci.1.653675	Proteles cristatus	Aardwolf	Myrmecophages	V4	Illumina	Delsuc et al. 2014
Pro.cri.Cinci.2.653727	Proteles cristatus	Aardwolf	Myrmecophages	V4	Illumina	Delsuc et al. 2014
Tam.tet.tet.SanDi.1.653742	Tamandua tetradactyla tetradactyla	Southern tamandua	Myrmecophages	V4	Illumina	Delsuc et al. 2014
Tam.tet.tet.SanDi.2.653746	Tamandua tetradactyla tetradactyla	Southern tamandua	Myrmecophages	V4	Illumina	Delsuc et al. 2014
Cho.did.SanDi.3.653677	Choloepus didactylus	Linnaeus two-toed sloth	Folivores	V4	Illumina	Delsuc et al. 2014
Cho.hof.Hous.1.653715	Choloepus hoffmanni	Hoffmann's two-toed sloth	Folivores	V4	Illumina	Delsuc et al. 2014
Chl.tru.Mend.1.653717	Choloepus hoffmanni	Pink fairy armadillo	Insectivores	V4	Illumina	Delsuc et al. 2014
Das.nov.Flori.2.653713	Dasypus novemcinctus	Nine-banded armadillo	Insectivores	V4	Illumina	Delsuc et al. 2014
Tol.mat.Cinci.3.653692	Tolypeutes matacus	Southern three-banded armadillo	Insectivores	V4	Illumina	Delsuc et al. 2014
Chae.vel.Cinci.2.653720	Chaetophractus vellerosus	Screaming hairy armadillo	Omnivores	V4	Illumina	Delsuc et al. 2014
Eup.sex.Mont.1.1.653701	Euphractus sexcinctus	Six-banded armadillo	Omnivores	V4	Illumina	Delsuc et al. 2014
Mel.urs.ino.SanDi.1.653664	Melursus ursinus inornatus	Sri Lankan sloth bear	Omnivores	V4	Illumina	Delsuc et al. 2014
Zae.pic.Mend.1.653683	Zaedyus pichiy	Pichi	Omnivores	V4	Illumina	Delsuc et al. 2014
Baboon	Papio hamadryas	Hamadryas baboon	Omnivores	V2	454	Muegge et al. 2011
Black bear	Ursus americanus	North American black bear	Omnivores	V2	454	Muegge et al. 2011
Black Lemur	Eulemur macaco macaco	Black lemur	Omnivores	V2	454	Muegge et al. 2011
Chimpanzee	Pan troglodytes	Chimpanzee	Omnivores	V2	454	Muegge et al. 2011
Ring-tailed lemur	Lemur catta	Ring-tailed lemur	Omnivores	V2	454	Muegge et al. 2011
Squirrel	Callosciurus prevostii	Prevost’s squirrel	Omnivores	V2	454	Muegge et al. 2011
Bush dog	Speothos venaticus	Bush dog	Carnivores	V2	454	Muegge et al. 2011
Hyena	Crocuta crocuta	Spotted hyena	Carnivores	V2	454	Muegge et al. 2011
Lion	Panthera leo	Lion	Carnivores	V2	454	Muegge et al. 2011
Polar Bear	Ursus maritimus	Polar bear	Carnivores	V2	454	Muegge et al. 2011
Bighorn sheep	Ovis canadensis	Bighorn sheep	Herbivores	V2	454	Muegge et al. 2011
Colobus	Colobus guereza	Black and white colobus monkey	Herbivores	V2	454	Muegge et al. 2011
Gazelle	Gazella spekei	Speke’s gazelle	Herbivores	V2	454	Muegge et al. 2011
Giraffe	Giraffa camelopardalis reticulata	Reticulated giraffe	Herbivores	V2	454	Muegge et al. 2011
Kangaroo	Macropus rufus	Red kangaroo	Herbivores	V2	454	Muegge et al. 2011
Okapi	Okapia johnstoni	Okapi	Herbivores	V2	454	Muegge et al. 2011
Rock hyrax	Procavia capensis	Rock hyrax	Herbivores	V2	454	Muegge et al. 2011
Springbok	Antidorcas marsupialis	Springbok	Herbivores	V2	454	Muegge et al. 2011
African elephant	Loxodonta africana	African elephant	Herbivores	V2	454	Muegge et al. 2011
Black rhinoceros	Diceros bicornis	Black rhinoceros	Herbivores	V2	454	Muegge et al. 2011
Capybara	Hydrochoeris hydrochaeris	Capybara	Herbivores	V2	454	Muegge et al. 2011
European rabbit	Oryctolagus cuniculus	European rabbit	Herbivores	V2	454	Muegge et al. 2011
Gorilla	Gorilla gorilla	Western lowland gorilla	Herbivores	V2	454	Muegge et al. 2011
Horse	Equus equus	Horse	Herbivores	V2	454	Muegge et al. 2011
Orangutan	Pongo pygmaeus abelii	Sumatran orangutan	Herbivores	V2	454	Muegge et al. 2011
Zebra	Equus grevyi	Grevy’s zebra	Herbivores	V2	454	Muegge et al. 2011
