# Supplementary material for: The gut microbiome of the Sunda pangolin (Manis javanica) reveals its adaptation to specialized myrmecophagy
Source: PeerJ journal article supplement (doi:10.7717/peerj.11490), 2021-06-02
Supplement: Supplementary_Table_S2.xlsx [file Supplementary_Table_S2.xlsx]

## Sheet: Sheet1
Table S2 Statistics of the filtered results.
Sample	PE reads	Clean reads	Avg Len (bp)
FS-02A	67311	65834	415.26
FS-06A	64807	62820	409.96
FS-06B	91986	87349	416.71
FS-06BF	107883	103841	408.59
FS-15M	86450	83640	408.58
FS-16	69730	67022	411.08
FS-18	54608	50720	417.91
FS-18A	119192	115813	408.51
FS-18B	73816	67212	412.33
