# Supplementary material for: The gut microbiome of the Sunda pangolin (Manis javanica) reveals its adaptation to specialized myrmecophagy
Source: PeerJ journal article supplement (doi:10.7717/peerj.11490), 2021-06-02
Supplement: Supplementary_Table_S3.xlsx [file Supplementary_Table_S3.xlsx]

## Sheet: Sheet1
Table S3 OTU table of nine Sunda pangolin samples.
OTU ID	FS-02A	FS-06A	FS-06B	FS-06BF	FS-15M	FS-16	FS-18	FS-18A	FS-18B	taxonomy
OTU1	0	0	0	0	0	0	0	1	0	d__Bacteria; p__Firmicutes; c__Clostridia; o__Clostridiales; f__Ruminococcaceae; g__Ruminococcaceae_UCG-009
OTU2	132	119	0	24	146	82	0	326	0	d__Bacteria; p__Firmicutes; c__Clostridia; o__Clostridiales; f__Lachnospiraceae; g__Blautia
OTU3	0	0	0	0	0	5	0	0	0	d__Bacteria; p__Actinobacteria; c__Actinobacteria; o__Coriobacteriales; f__Coriobacteriaceae; g__Enterorhabdus; s__uncultured_bacterium
OTU4	78	91	0	38	67	23	73	6	2	d__Bacteria; p__Firmicutes; c__Clostridia; o__Clostridiales; f__Lachnospiraceae; g__Epulopiscium; s__uncultured_bacterium
OTU5	0	0	0	0	0	6	0	0	0	d__Bacteria; p__Firmicutes; c__Bacilli; o__Lactobacillales; f__Streptococcaceae; g__Streptococcus
OTU6	0	8	0	0	0	0	0	1	0	d__Bacteria; p__Firmicutes; c__Clostridia; o__Clostridiales; f__Lachnospiraceae; g__Lachnospiraceae_NK4A136_group
OTU7	0	0	23	0	0	0	0	1	0	d__Bacteria; p__Firmicutes; c__Bacilli; o__Bacillales; f__Planococcaceae; g__Sporosarcina; s__uncultured_bacterium
OTU8	0	0	0	0	0	20	0	1	0	d__Bacteria; p__Actinobacteria; c__Actinobacteria; o__Propionibacteriales; f__Nocardioidaceae; g__Nocardioides; s__Nocardioides_exalbidus
OTU9	204	32	0	4	29	345	0	789	0	d__Bacteria; p__Firmicutes; c__Clostridia; o__Clostridiales; f__Ruminococcaceae; g__uncultured; s__Ruminococcaceae_bacterium_668
OTU10	0	0	0	0	0	0	3	0	0	d__Bacteria; p__Firmicutes; c__Bacilli; o__Lactobacillales
OTU11	0	0	11	0	0	0	0	0	0	d__Bacteria; p__Firmicutes; c__Clostridia; o__Clostridiales; f__Ruminococcaceae
OTU12	0	1	0	2	0	0	0	3	0	d__Bacteria; p__Actinobacteria; c__Actinobacteria; o__Frankiales; f__Geodermatophilaceae; g__uncultured; s__uncultured_bacterium
OTU13	0	0	0	0	0	4	0	0	0	d__Bacteria; p__Firmicutes; c__Clostridia; o__Clostridiales; f__Ruminococcaceae; g__[Eubacterium]_coprostanoligenes_group; s__gut_metagenome
OTU14	0	49	0	0	0	3	0	3	0	d__Bacteria; p__Bacteroidetes; c__Bacteroidia; o__Bacteroidales; f__Bacteroidaceae; g__Bacteroides; s__Bacteroides_helcogenes_P_36-108
OTU15	1	1	1075	0	0	26	9	0	0	d__Bacteria; p__Proteobacteria; c__Gammaproteobacteria; o__Pseudomonadales; f__Moraxellaceae; g__Acinetobacter
OTU16	0	0	0	0	0	96	0	0	0	d__Bacteria; p__Proteobacteria; c__Gammaproteobacteria; o__Pseudomonadales; f__Moraxellaceae; g__Psychrobacter; s__Psychrobacter_ciconiae
OTU17	0	0	0	0	1	0	0	3	0	d__Bacteria; p__Actinobacteria; c__Actinobacteria; o__Micrococcales; f__Dermabacteraceae; g__Brachybacterium; s__Brachybacterium_nesterenkovii
OTU18	16	12	574	21	38	45	44	330	32	d__Bacteria; p__Actinobacteria; c__Actinobacteria; o__Corynebacteriales; f__Corynebacteriaceae; g__Corynebacterium_1; s__Corynebacterium_freneyi
OTU19	0	0	0	0	0	4	0	0	0	d__Bacteria; p__Firmicutes; c__Erysipelotrichia; o__Erysipelotrichales; f__Erysipelotrichaceae; g__uncultured; s__unidentified
OTU20	0	0	0	0	0	3	0	46	6	d__Bacteria; p__Actinobacteria; c__Actinobacteria; o__Streptosporangiales; f__Nocardiopsaceae; g__Nocardiopsis; s__uncultured_bacterium
OTU21	2	0	0	0	0	28	0	0	0	d__Bacteria; p__Firmicutes; c__Clostridia; o__Clostridiales; f__Ruminococcaceae
OTU22	0	23	0	0	0	0	0	1	0	d__Bacteria; p__Firmicutes; c__Bacilli; o__Lactobacillales; f__Streptococcaceae; g__Streptococcus; s__Streptococcus_uberis
OTU23	1	0	0	0	3	0	0	1	0	d__Bacteria; p__Firmicutes; c__Erysipelotrichia; o__Erysipelotrichales; f__Erysipelotrichaceae; g__Faecalitalea; s__[Eubacterium]_dolichum
OTU24	0	0	0	0	0	0	0	4	0	d__Bacteria; p__Actinobacteria; c__Actinobacteria; o__Acidimicrobiales
OTU25	4	0	0	0	0	98	2	0	0	d__Bacteria; p__Actinobacteria; c__Actinobacteria; o__Coriobacteriales; f__Coriobacteriaceae; g__Olsenella
OTU26	0	0	0	0	0	0	4	0	0	d__Bacteria; p__Firmicutes; c__Erysipelotrichia; o__Erysipelotrichales; f__Erysipelotrichaceae; g__uncultured; s__Firmicutes_bacterium_ZOR0006
OTU27	0	0	0	0	0	3	0	0	0	d__Bacteria; p__Firmicutes; c__Erysipelotrichia; o__Erysipelotrichales; f__Erysipelotrichaceae; g__Allobaculum; s__uncultured_Allobaculum_sp.
OTU28	4	0	0	0	0	22	0	0	0	d__Bacteria; p__Firmicutes; c__Clostridia; o__Clostridiales; f__Ruminococcaceae
OTU29	5	80	133	12	30	2	5	33	10	d__Bacteria; p__Firmicutes; c__Bacilli; o__Lactobacillales; f__Enterococcaceae; g__Enterococcus; s__Enterococcus_faecalis
OTU30	0	0	0	0	0	3	0	0	0	d__Bacteria; p__Firmicutes; c__Bacilli; o__Lactobacillales; f__Carnobacteriaceae
OTU31	0	0	2307	0	0	0	1	0	0	d__Bacteria; p__Proteobacteria; c__Gammaproteobacteria; o__Xanthomonadales; f__Xanthomonadaceae; g__Ignatzschineria; s__uncultured_bacterium
OTU32	0	0	9	0	0	0	0	0	0	d__Bacteria; p__Firmicutes; c__Bacilli; o__Bacillales; f__Paenibacillaceae; g__Paenibacillus
OTU33	0	0	0	0	0	1	0	9	0	d__Bacteria; p__Firmicutes; c__Clostridia; o__Clostridiales; f__Ruminococcaceae; g__Oscillibacter; s__Oscillibacter_ruminantium_GH1
OTU34	12	0	15	2	0	0	55	117	0	d__Bacteria; p__Actinobacteria; c__Actinobacteria; o__Corynebacteriales; f__Corynebacteriaceae; g__Corynebacterium_1; s__Corynebacterium_stationis
OTU35	0	0	14	0	0	0	0	0	0	d__Bacteria; p__Firmicutes; c__Clostridia; o__Clostridiales; f__Family_XI; g__Anaerococcus; s__uncultured_bacterium
OTU36	0	0	0	0	0	0	0	7	0	d__Bacteria; p__Firmicutes; c__Clostridia; o__Clostridiales; f__Ruminococcaceae; g__Ruminococcaceae_NK4A214_group
OTU37	0	0	0	0	0	35	2	0	0	d__Bacteria; p__Bacteroidetes; c__Bacteroidia; o__Bacteroidales; f__Prevotellaceae; g__Prevotella_6; s__Prevotella_bergensis
OTU38	0	0	0	0	0	4	0	0	0	d__Bacteria; p__Firmicutes; c__Clostridia; o__Clostridiales; f__Ruminococcaceae; g__Ruminococcaceae_UCG-013
OTU39	1	1	0	1	20	4	0	9	0	d__Bacteria; p__Firmicutes; c__Clostridia; o__Clostridiales; f__Ruminococcaceae; g__uncultured; s__Ruminococcaceae_bacterium_mt9
OTU40	0	0	0	0	0	7	0	0	0	d__Bacteria; p__Tenericutes; c__Mollicutes; o__Mollicutes_RF9; f__norank; g__norank; s__uncultured_bacterium
OTU41	0	0	7	0	0	0	0	4	0	d__Bacteria; p__Actinobacteria; c__Actinobacteria; o__Micrococcales; f__Dermabacteraceae; g__Brachybacterium
OTU42	0	0	0	0	0	9	0	0	0	d__Bacteria; p__Bacteroidetes; c__Sphingobacteriia; o__Sphingobacteriales; f__Chitinophagaceae; g__uncultured
OTU43	0	0	140	0	0	0	0	1	0	d__Bacteria; p__Proteobacteria; c__Alphaproteobacteria; o__Rhizobiales; f__Hyphomicrobiaceae; g__Pelagibacterium
OTU44	0	0	0	0	0	13	0	0	0	d__Bacteria; p__Bacteroidetes; c__Bacteroidia; o__Bacteroidales; f__Bacteroidaceae; g__Bacteroides; s__uncultured_bacterium
OTU45	0	147	2	1	0	0	7	1	0	d__Bacteria; p__Proteobacteria; c__Gammaproteobacteria; o__Enterobacteriales; f__Enterobacteriaceae; g__Proteus; s__Proteus_mirabilis
OTU46	0	0	11	0	0	19	10	7	0	d__Bacteria; p__Actinobacteria; c__Actinobacteria; o__Micrococcales; f__Brevibacteriaceae; g__Brevibacterium
OTU47	8	2	0	0	0	16	0	1	0	d__Bacteria; p__Firmicutes; c__Clostridia; o__Clostridiales; f__Eubacteriaceae; g__Anaerofustis; s__Anaerofustis_stercorihominis_DSM_17244
OTU48	0	0	0	0	0	0	3	0	0	d__Bacteria; p__Bacteroidetes
OTU49	0	0	14	0	0	23	0	0	0	d__Bacteria; p__Proteobacteria; c__Betaproteobacteria; o__Burkholderiales; f__Comamonadaceae
OTU50	168	350	9	750	117	104	78	285	50	d__Bacteria; p__Firmicutes; c__Clostridia; o__Clostridiales; f__Clostridiaceae_1; g__Clostridium_sensu_stricto_1
OTU51	0	0	0	0	0	1	3	0	0	d__Bacteria; p__Firmicutes; c__Bacilli; o__Lactobacillales; f__Carnobacteriaceae; g__Jeotgalibaca; s__uncultured_bacterium
OTU52	0	0	0	0	0	7	0	0	0	d__Bacteria; p__Actinobacteria; c__Actinobacteria; o__Solirubrobacterales; f__TM146; g__norank; s__uncultured_bacterium
OTU53	2	1	0	0	0	0	0	5	0	d__Bacteria; p__Firmicutes; c__Clostridia; o__Clostridiales; f__Lachnospiraceae; g__Coprococcus_1
OTU54	0	0	102	0	0	0	0	2	0	d__Bacteria; p__Proteobacteria; c__Alphaproteobacteria; o__Rhodobacterales; f__Rhodobacteraceae
OTU55	1	1	6	0	15	0	2	42	1	d__Bacteria; p__Actinobacteria; c__Actinobacteria; o__Corynebacteriales; f__Nocardiaceae; g__Gordonia
OTU56	0	0	0	0	0	1	3	0	0	d__Bacteria; p__Bacteroidetes; c__Bacteroidia; o__Bacteroidales; f__Prevotellaceae; g__Prevotella; s__Prevotella_disiens
OTU57	4	4	0	3	0	14	24	0	1	d__Bacteria; p__Firmicutes; c__Clostridia; o__Clostridiales; f__Peptostreptococcaceae; g__Peptostreptococcus
OTU58	0	0	0	0	0	99	0	0	0	d__Bacteria; p__Firmicutes; c__Erysipelotrichia; o__Erysipelotrichales; f__Erysipelotrichaceae; g__Allobaculum; s__uncultured_bacterium
OTU59	30	1	0	0	0	2	0	6	0	d__Bacteria; p__Firmicutes; c__Clostridia; o__Clostridiales; f__Ruminococcaceae; g__Anaerotruncus; s__Clostridium_sp._YIT_12070
OTU60	9	11	0	4	35	4	1	11	0	d__Bacteria; p__Firmicutes; c__Clostridia; o__Clostridiales; f__Lachnospiraceae; g__Cellulosilyticum; s__uncultured_bacterium
OTU61	0	0	0	0	0	6	0	0	0	d__Bacteria; p__Firmicutes; c__Negativicutes; o__Selenomonadales; f__Acidaminococcaceae; g__Phascolarctobacterium
OTU62	14	13	3	9	0	0	1	0	0	d__Bacteria; p__Firmicutes; c__Bacilli; o__Lactobacillales; f__Streptococcaceae; g__Lactococcus
OTU63	0	0	473	0	0	0	0	0	0	d__Bacteria; p__Firmicutes; c__Erysipelotrichia; o__Erysipelotrichales; f__Erysipelotrichaceae; g__Erysipelothrix; s__uncultured_bacterium
OTU64	1	4	136	0	0	128	0	24	0	d__Bacteria; p__Proteobacteria; c__Alphaproteobacteria; o__Rhodobacterales; f__Rhodobacteraceae; g__Paracoccus
OTU65	0	0	0	0	0	6	0	0	0	d__Bacteria; p__Firmicutes; c__Clostridia; o__Clostridiales; f__Lachnospiraceae
OTU66	0	0	0	0	0	0	0	1	0	d__Bacteria; p__Firmicutes; c__Clostridia; o__Clostridiales; f__Ruminococcaceae; g__Ruminococcaceae_UCG-013; s__uncultured_Clostridiales_bacterium
OTU67	0	0	0	0	0	6	0	0	15	d__Bacteria; p__Actinobacteria; c__Actinobacteria; o__Propionibacteriales; f__Propionibacteriaceae; g__Propionibacterium; s__Propionibacterium_acnes_subsp._acnes
OTU68	0	0	0	0	0	1	0	0	0	d__Bacteria; p__Firmicutes; c__Clostridia; o__Clostridiales; f__Lachnospiraceae
OTU69	0	1	0	1	0	0	0	13	0	d__Bacteria; p__Firmicutes; c__Erysipelotrichia; o__Erysipelotrichales; f__Erysipelotrichaceae; g__Faecalitalea; s__uncultured_Firmicutes_bacterium
OTU70	0	0	25	0	0	0	0	0	0	d__Bacteria; p__Firmicutes; c__Bacilli; o__Bacillales; f__Bacillaceae; g__Bacillus; s__uncultured_bacterium
OTU71	0	0	0	0	0	0	3	0	0	d__Bacteria; p__Proteobacteria; c__Betaproteobacteria; o__Rhodocyclales; f__Rhodocyclaceae; g__Dechloromonas; s__uncultured_bacterium
OTU72	0	0	0	0	0	9	0	0	0	d__Bacteria; p__Bacteroidetes; c__Flavobacteriia; o__Flavobacteriales; f__Flavobacteriaceae; g__Chryseobacterium; s__uncultured_Bacteroidetes_bacterium
OTU73	0	0	3	0	6	0	0	0	0	d__Bacteria; p__Proteobacteria; c__Alphaproteobacteria; o__Rhizobiales; f__Bradyrhizobiaceae
OTU74	0	0	41	0	0	0	0	0	0	d__Bacteria; p__Firmicutes; c__Clostridia; o__Clostridiales; f__Clostridiaceae_2; g__Alkaliphilus
OTU75	102	119	8	10	6	39	45	4	0	d__Bacteria; p__Firmicutes; c__Bacilli; o__Bacillales; f__Bacillaceae; g__Bacillus
OTU76	0	3	0	0	0	0	0	0	0	d__Bacteria; p__Firmicutes; c__Clostridia; o__Clostridiales; f__Ruminococcaceae; g__Hydrogenoanaerobacterium
OTU77	0	0	0	0	0	36	0	0	0	d__Bacteria; p__Firmicutes; c__Clostridia; o__Clostridiales
OTU78	0	0	0	0	0	39	3	0	0	d__Bacteria; p__Firmicutes; c__Clostridia; o__Clostridiales; f__Ruminococcaceae; g__Ruminococcus_1; s__uncultured_rumen_bacterium
OTU79	0	0	0	0	0	24	0	0	0	d__Bacteria; p__Firmicutes; c__Bacilli; o__Lactobacillales
OTU80	0	0	0	0	0	47	0	4	0	d__Bacteria; p__Firmicutes; c__Clostridia; o__Clostridiales; f__Ruminococcaceae; g__Anaerofilum; s__uncultured_bacterium
OTU81	7	4	0	3	0	0	0	0	0	d__Bacteria; p__Firmicutes; c__Bacilli; o__Bacillales; f__Planococcaceae; g__Domibacillus; s__uncultured_bacterium
OTU82	0	0	14	0	0	5	0	0	0	d__Bacteria; p__Proteobacteria; c__Alphaproteobacteria; o__Caulobacterales; f__Caulobacteraceae; g__Brevundimonas; s__Brevundimonas_diminuta
OTU83	93	12	7	75	345	414	17	221	1	d__Bacteria; p__Firmicutes; c__Clostridia; o__Clostridiales; f__Peptostreptococcaceae; g__Paeniclostridium
OTU84	0	0	0	0	0	3	0	0	0	d__Bacteria; p__Actinobacteria; c__Actinobacteria; o__Micrococcales; f__Intrasporangiaceae; g__Ornithinimicrobium; s__uncultured_bacterium
OTU85	0	0	0	0	0	3	0	0	0	d__Bacteria; p__Bacteroidetes; c__Bacteroidia; o__Bacteroidales; f__Bacteroidales_S24-7_group; g__norank; s__unidentified
OTU86	0	0	3	0	0	0	0	0	0	d__Bacteria; p__Actinobacteria; c__Actinobacteria; o__Propionibacteriales; f__Propionibacteriaceae; g__Tessaracoccus
OTU87	0	0	724	0	0	0	0	0	0	d__Bacteria; p__Proteobacteria; c__Betaproteobacteria; o__Burkholderiales; f__Alcaligenaceae; g__Paenalcaligenes
OTU88	149	109	16	38	48	86	2	85	0	d__Bacteria; p__Firmicutes; c__Erysipelotrichia; o__Erysipelotrichales; f__Erysipelotrichaceae; g__Faecalitalea
OTU89	0	0	0	0	0	19	0	0	0	d__Bacteria; p__Firmicutes; c__Clostridia; o__Clostridiales; f__Ruminococcaceae; g__Ruminiclostridium_9; s__[Clostridium]_viride
OTU90	0	0	0	0	0	0	0	3	0	d__Bacteria; p__Firmicutes; c__Clostridia; o__Clostridiales; f__Ruminococcaceae; g__Anaerotruncus; s__uncultured_organism
OTU91	0	0	0	0	0	66	0	0	0	d__Bacteria; p__Actinobacteria; c__Actinobacteria; o__Propionibacteriales; f__Propionibacteriaceae
OTU92	20	4	0	3	14	0	14	4	0	d__Bacteria; p__Firmicutes; c__Clostridia; o__Clostridiales; f__Lachnospiraceae
OTU93	0	0	6	0	0	0	0	0	0	d__Bacteria; p__Actinobacteria; c__Actinobacteria; o__Actinomycetales; f__Actinomycetaceae; g__Actinomyces; s__uncultured_Actinomycetales_bacterium
OTU94	0	0	0	0	0	0	15	0	0	d__Bacteria; p__Bacteroidetes; c__Flavobacteriia; o__Flavobacteriales; f__Flavobacteriaceae; g__Empedobacter; s__uncultured_bacterium
OTU95	0	0	0	0	0	6	0	0	0	d__Bacteria; p__Firmicutes; c__Clostridia; o__Clostridiales; f__Ruminococcaceae; g__Ruminiclostridium_5
OTU96	14	0	0	0	0	0	0	5	0	d__Bacteria; p__Bacteroidetes; c__Bacteroidia; o__Bacteroidales; f__Porphyromonadaceae; g__Parabacteroides; s__Monocercomonoides_sp._PA203
OTU97	0	0	0	0	0	9	0	1	0	d__Bacteria; p__Bacteroidetes; c__Sphingobacteriia; o__Sphingobacteriales; f__Sphingobacteriaceae; g__Sphingobacterium; s__Sphingobacterium_kyonggiense
OTU98	0	0	25	0	0	0	0	0	0	d__Bacteria; p__Firmicutes; c__Bacilli; o__Lactobacillales; f__Carnobacteriaceae; g__Trichococcus
OTU99	0	0	3	0	0	3	0	0	0	d__Bacteria; p__Bacteroidetes; c__Sphingobacteriia; o__Sphingobacteriales; f__Chitinophagaceae; g__uncultured
OTU101	0	0	11	2	0	0	0	0	0	d__Bacteria; p__Actinobacteria; c__Actinobacteria; o__Micrococcales; f__Micrococcaceae; g__Rothia
OTU102	0	0	0	0	0	9	0	0	0	d__Bacteria; p__Firmicutes; c__Clostridia; o__Clostridiales; f__Clostridiales_vadinBB60_group; g__norank; s__uncultured_bacterium
OTU103	3	0	0	0	0	0	0	26	0	d__Bacteria; p__Firmicutes; c__Clostridia; o__Clostridiales; f__Eubacteriaceae; g__Eubacterium
OTU104	1	0	0	0	0	0	0	7	0	d__Bacteria; p__Firmicutes; c__Clostridia; o__Clostridiales; f__Ruminococcaceae; g__uncultured; s__uncultured_Clostridium_sp.
OTU105	7	2	0	0	0	62	0	21	0	d__Bacteria; p__Firmicutes; c__Clostridia; o__Clostridiales; f__Ruminococcaceae; g__Ruminiclostridium_5
OTU106	0	0	44	0	0	0	0	0	0	d__Bacteria; p__Proteobacteria; c__Gammaproteobacteria; o__Pseudomonadales; f__Pseudomonadaceae; g__Pseudomonas
OTU107	0	0	77	0	0	0	0	1	0	d__Bacteria; p__Firmicutes; c__Bacilli; o__Bacillales; f__Planococcaceae; g__Sporosarcina
OTU108	0	0	0	0	0	19	0	1	0	d__Bacteria; p__Firmicutes; c__Clostridia; o__Clostridiales; f__Ruminococcaceae; g__uncultured
OTU109	0	0	97	0	0	0	5	0	0	d__Bacteria; p__Proteobacteria; c__Gammaproteobacteria; o__Xanthomonadales; f__Xanthomonadaceae; g__Wohlfahrtiimonas; s__Wohlfahrtiimonas_chitiniclastica
OTU110	0	4	0	0	1	0	2	0	7	d__Bacteria; p__Firmicutes; c__Bacilli; o__Lactobacillales; f__Lactobacillaceae; g__Lactobacillus
OTU111	0	0	0	0	9	0	0	1	0	d__Bacteria; p__Actinobacteria; c__Actinobacteria; o__Micrococcales
OTU112	14	1	0	0	0	48	0	2	0	d__Bacteria; p__Firmicutes; c__Clostridia; o__Clostridiales; f__Lachnospiraceae; g__Tyzzerella_4
OTU113	0	0	0	0	0	0	0	4	0	d__Bacteria; p__Firmicutes; c__Bacilli; o__Lactobacillales; f__Aerococcaceae; g__Globicatella; s__uncultured_bacterium
OTU114	3	0	0	0	0	0	88	0	0	d__Bacteria; p__Firmicutes; c__Bacilli; o__Bacillales; f__Planococcaceae; g__Kurthia
OTU115	0	0	0	0	0	7	1	0	0	d__Bacteria; p__Firmicutes; c__Erysipelotrichia; o__Erysipelotrichales; f__Erysipelotrichaceae; g__Allobaculum; s__uncultured_bacterium
OTU116	2	0	0	0	0	0	0	1	0	d__Bacteria; p__Firmicutes; c__Clostridia; o__Clostridiales; f__Lachnospiraceae; g__Howardella
OTU117	3	0	0	1	0	7	1	0	0	d__Bacteria; p__Firmicutes; c__Clostridia; o__Clostridiales; f__Family_XI; g__Anaerococcus
OTU118	0	0	0	0	0	5	3	0	0	d__Bacteria; p__Firmicutes; c__Bacilli; o__Lactobacillales; f__Carnobacteriaceae
OTU119	2	2	0	1	0	0	0	0	0	d__Bacteria; p__Firmicutes; c__Clostridia; o__Clostridiales; f__Ruminococcaceae
OTU120	1235	1557	1761	2430	1787	1704	783	2203	1342	d__Bacteria; p__Firmicutes; c__Clostridia; o__Clostridiales; f__Peptostreptococcaceae
OTU121	0	0	1	0	0	0	0	0	0	d__Bacteria; p__Proteobacteria; c__Gammaproteobacteria; o__Xanthomonadales; f__Xanthomonadaceae; g__Ignatzschineria; s__uncultured_bacterium
OTU122	0	0	3	0	0	0	0	0	0	d__Bacteria; p__Proteobacteria; c__Gammaproteobacteria; o__Xanthomonadales; f__Xanthomonadaceae; g__Dokdonella
OTU123	0	0	75	0	0	0	1	0	0	d__Bacteria; p__Firmicutes; c__Bacilli; o__Lactobacillales; f__Enterococcaceae; g__Vagococcus; s__Vagococcus_fluvialis
OTU124	0	0	0	0	0	10	0	0	0	d__Bacteria; p__Firmicutes; c__Clostridia; o__Clostridiales; f__Ruminococcaceae; g__Ruminiclostridium_6; s__uncultured_bacterium
OTU125	0	0	17	0	0	0	0	0	0	d__Bacteria; p__Proteobacteria; c__Alphaproteobacteria; o__Rhodobacterales; f__Rhodobacteraceae; g__Rubellimicrobium; s__uncultured_bacterium
OTU126	1	30	0	0	0	2	0	0	0	d__Bacteria; p__Firmicutes; c__Clostridia; o__Clostridiales; f__Lachnospiraceae; g__Tyzzerella
OTU127	0	2	0	1	206	2	0	1	0	d__Bacteria; p__Firmicutes; c__Clostridia; o__Clostridiales; f__Lachnospiraceae; g__Fusicatenibacter; s__uncultured_organism
OTU128	1	1	0	0	0	1	0	0	0	d__Bacteria; p__Firmicutes; c__Erysipelotrichia; o__Erysipelotrichales; f__Erysipelotrichaceae; g__Dielma
OTU129	1	0	0	0	0	0	0	0	9	d__Bacteria; p__Proteobacteria; c__Gammaproteobacteria; o__Pseudomonadales; f__Moraxellaceae; g__Enhydrobacter; s__Moraxella_osloensis
OTU130	0	0	0	0	1	0	0	0	0	d__Bacteria; p__Actinobacteria; c__Actinobacteria; o__Solirubrobacterales; f__Elev-16S-1332; g__norank
OTU131	0	0	70	0	1	0	0	0	0	d__Bacteria; p__Proteobacteria; c__Alphaproteobacteria; o__Rhizobiales; f__Hyphomicrobiaceae; g__Devosia; s__uncultured_alpha_proteobacterium
OTU132	4	0	0	0	0	5	0	0	0	d__Bacteria; p__Firmicutes; c__Clostridia; o__Clostridiales; f__Ruminococcaceae; g__Butyricicoccus; s__uncultured_organism
OTU133	0	0	0	0	0	0	0	1	0	d__Bacteria; p__Actinobacteria; c__Actinobacteria; o__Propionibacteriales; f__Propionibacteriaceae
OTU134	0	0	0	0	0	37	0	0	0	d__Bacteria; p__Bacteroidetes; c__Bacteroidia; o__Bacteroidales; f__Bacteroidales_S24-7_group; g__norank; s__uncultured_bacterium
OTU135	1	0	0	0	0	0	0	2	7	d__Bacteria; p__Actinobacteria; c__Actinobacteria; o__Actinomycetales; f__Actinomycetaceae; g__Actinomyces
OTU136	72	223	1	9	131	25	5	23	0	d__Bacteria; p__Bacteroidetes; c__Bacteroidia; o__Bacteroidales; f__Bacteroidaceae; g__Bacteroides; s__Bacteroides_fragilis
OTU137	0	0	1	0	0	0	0	0	0	d__Bacteria; p__Firmicutes
OTU138	0	9	0	0	0	0	0	0	0	d__Bacteria; p__Firmicutes; c__Erysipelotrichia; o__Erysipelotrichales; f__Erysipelotrichaceae; g__Breznakia; s__uncultured_bacterium
OTU139	33	317	48	5	38	0	0	241	7	d__Bacteria; p__Actinobacteria; c__Actinobacteria; o__Coriobacteriales; f__Coriobacteriaceae; g__Paraeggerthella; s__Paraeggerthella_hongkongensis
OTU140	0	0	0	0	0	32	0	0	0	d__Bacteria; p__Firmicutes; c__Clostridia; o__Clostridiales; f__Ruminococcaceae; g__uncultured
OTU141	4280	12635	972	13072	6905	11722	5360	7676	5637	d__Bacteria; p__Firmicutes; c__Clostridia; o__Clostridiales; f__Clostridiaceae_1; g__Clostridium_sensu_stricto_1
OTU142	17	303	51	125	17	48	94	1	0	d__Bacteria; p__Firmicutes; c__Clostridia; o__Clostridiales; f__Lachnospiraceae; g__Epulopiscium
OTU143	1	2	289	0	0	145	4	2	9	d__Bacteria; p__Actinobacteria; c__Actinobacteria; o__Micrococcales; f__Micrococcaceae; g__Glutamicibacter; s__Glutamicibacter_creatinolyticus
OTU144	1	0	0	0	0	0	0	3	1	d__Bacteria; p__Fusobacteria; c__Fusobacteriia; o__Fusobacteriales; f__Fusobacteriaceae; g__Fusobacterium; s__Fusobacterium_varium
OTU145	1	0	126	0	0	0	43	16	0	d__Bacteria; p__Actinobacteria; c__Actinobacteria; o__Corynebacteriales
OTU146	1	0	0	0	0	6	0	4	0	d__Bacteria; p__Firmicutes; c__Clostridia; o__Clostridiales; f__Ruminococcaceae
OTU147	0	0	0	0	0	0	3	0	0	d__Bacteria; p__Firmicutes; c__Clostridia; o__Clostridiales; f__Family_XI; g__uncultured
OTU148	873	417	1090	667	200	582	757	1365	5445	d__Bacteria; p__Firmicutes; c__Bacilli; o__Lactobacillales; f__Streptococcaceae; g__Lactococcus
OTU149	58	0	0	2	12	130	0	8	0	d__Bacteria; p__Firmicutes; c__Clostridia; o__Clostridiales; f__Ruminococcaceae; g__Flavonifractor; s__uncultured_bacterium
OTU150	3594	3491	4376	7470	1863	2006	1348	5863	4861	d__Bacteria; p__Firmicutes; c__Clostridia; o__Clostridiales; f__Peptostreptococcaceae
OTU151	0	0	5	0	0	0	1	0	0	d__Bacteria; p__Firmicutes; c__Erysipelotrichia; o__Erysipelotrichales; f__Erysipelotrichaceae; g__uncultured; s__uncultured_Firmicutes_bacterium
OTU152	0	0	0	0	0	55	0	2	0	d__Bacteria; p__Firmicutes; c__Clostridia; o__Clostridiales; f__Ruminococcaceae; g__Butyricicoccus
OTU153	0	0	11	0	0	0	0	0	0	d__Bacteria; p__Firmicutes; c__Erysipelotrichia; o__Erysipelotrichales; f__Erysipelotrichaceae; g__Erysipelothrix; s__uncultured_bacterium
OTU154	0	0	0	0	0	1	0	0	0	d__Bacteria; p__Firmicutes; c__Clostridia; o__Clostridiales; f__Ruminococcaceae; g__Ruminococcaceae_UCG-010; s__uncultured_bacterium
OTU155	0	0	7	0	0	22	0	0	0	d__Bacteria; p__Firmicutes; c__Bacilli; o__Lactobacillales; f__Carnobacteriaceae; g__Lacticigenium; s__uncultured_bacterium
OTU156	5	1	0	0	8	16	0	43	0	d__Bacteria; p__Actinobacteria; c__Actinobacteria; o__Coriobacteriales; f__Coriobacteriaceae; g__Gordonibacter; s__Gordonibacter_urolithinfaciens
OTU157	0	0	0	0	0	0	2	0	0	d__Bacteria; p__Bacteroidetes; c__Sphingobacteriia; o__Sphingobacteriales; f__Chitinophagaceae
OTU158	1	1	1930	1	0	115	13	20	0	d__Bacteria; p__Actinobacteria; c__Actinobacteria; o__Micrococcales; f__Microbacteriaceae; g__Leucobacter
OTU159	0	0	3	0	0	0	11	0	0	d__Bacteria; p__Proteobacteria; c__Gammaproteobacteria; o__Aeromonadales; f__Aeromonadaceae; g__Aeromonas; s__Aeromonas_veronii
OTU160	1	0	0	0	0	0	0	7	0	d__Bacteria; p__Firmicutes; c__Clostridia; o__Clostridiales; f__Ruminococcaceae; g__Ruminococcaceae_UCG-013; s__uncultured_Clostridiaceae_bacterium
OTU161	1494	2736	4883	1377	0	0	453	0	0	d__Bacteria; p__Firmicutes; c__Bacilli; o__Lactobacillales; f__Streptococcaceae; g__Lactococcus
OTU162	0	0	78	0	0	0	0	0	0	d__Bacteria; p__Bacteroidetes; c__Bacteroidia; o__Bacteroidales; f__Porphyromonadaceae; g__Dysgonomonas; s__uncultured_bacterium
OTU163	26	34	9	20	589	37	1	22	0	d__Bacteria; p__Firmicutes; c__Clostridia; o__Clostridiales; f__Lachnospiraceae
OTU164	1	11	114	4	0	10	0	136	0	d__Bacteria; p__Chloroflexi; c__Thermomicrobia; o__JG30-KF-CM45; f__norank; g__norank; s__uncultured_bacterium
OTU165	0	0	0	0	0	418	0	0	0	d__Bacteria; p__Firmicutes; c__Clostridia; o__Clostridiales; f__Lachnospiraceae; g__Lachnospiraceae_NK4A136_group; s__uncultured_bacterium
OTU166	433	299	4	17	175	110	3	101	0	d__Bacteria; p__Firmicutes; c__Clostridia; o__Clostridiales; f__Ruminococcaceae; g__Anaerofilum; s__uncultured_bacterium
OTU167	0	2	0	0	0	98	0	6	0	d__Bacteria; p__Actinobacteria; c__Actinobacteria; o__Micrococcales; f__Dermatophilaceae
OTU168	33	0	0	0	23	0	0	18	0	d__Bacteria; p__Firmicutes; c__Clostridia; o__Clostridiales; f__Ruminococcaceae; g__uncultured
OTU169	0	0	0	0	0	0	0	2	0	d__Bacteria; p__Firmicutes; c__Bacilli; o__Lactobacillales; f__Aerococcaceae; g__Facklamia; s__uncultured_bacterium
OTU170	61	10	0	2	17	0	3	46	0	d__Bacteria; p__Firmicutes; c__Erysipelotrichia; o__Erysipelotrichales; f__Erysipelotrichaceae; g__Faecalitalea; s__uncultured_bacterium
OTU171	0	0	0	0	0	8	0	4	0	d__Bacteria; p__Firmicutes; c__Clostridia; o__Clostridiales; f__Ruminococcaceae
OTU172	0	0	0	0	0	3	0	0	0	d__Bacteria; p__Firmicutes; c__Clostridia; o__Clostridiales; f__Ruminococcaceae
OTU173	0	0	4	0	0	0	0	0	0	d__Bacteria; p__Proteobacteria; c__Gammaproteobacteria; o__Pseudomonadales; f__Moraxellaceae; g__Alkanindiges; s__uncultured_bacterium
OTU174	0	0	1040	1	0	4614	0	0	0	d__Bacteria; p__Firmicutes; c__Bacilli; o__Bacillales; f__Planococcaceae; g__Sporosarcina
OTU175	0	0	0	0	4	0	0	1	0	d__Bacteria; p__Proteobacteria; c__Alphaproteobacteria; o__Rhizobiales; f__Methylobacteriaceae; g__Methylobacterium
OTU176	0	0	329	0	0	0	0	0	0	d__Bacteria; p__Proteobacteria; c__Alphaproteobacteria; o__Rhizobiales; f__Phyllobacteriaceae; g__Aminobacter; s__uncultured_bacterium
OTU177	22	46	0	4	24	12	3	64	0	d__Bacteria; p__Firmicutes; c__Erysipelotrichia; o__Erysipelotrichales; f__Erysipelotrichaceae; g__Coprobacillus; s__Coprobacillus_cateniformis
OTU178	10	0	0	0	0	0	0	82	0	d__Bacteria; p__Firmicutes; c__Clostridia; o__Clostridiales; f__Christensenellaceae; g__Christensenellaceae_R-7_group; s__uncultured_organism
OTU179	0	0	94	0	0	4	4	0	0	d__Bacteria; p__Firmicutes; c__Bacilli; o__Lactobacillales; f__Aerococcaceae; g__uncultured; s__uncultured_bacterium
OTU180	2	0	0	0	0	0	0	4	0	d__Bacteria; p__Firmicutes; c__Clostridia; o__Clostridiales; f__Lachnospiraceae; g__Lachnospiraceae_FCS020_group; s__uncultured_bacterium
OTU181	0	0	6	0	0	0	0	0	0	d__Bacteria; p__Saccharibacteria; c__norank; o__norank; f__norank; g__norank; s__uncultured_bacterium
OTU182	0	0	0	0	0	44	0	0	0	d__Bacteria; p__Firmicutes; c__Clostridia; o__Clostridiales; f__Lachnospiraceae; g__Lachnospiraceae_UCG-006; s__uncultured_bacterium
OTU183	0	0	0	0	0	1	0	0	0	d__Bacteria; p__Firmicutes; c__Clostridia; o__Clostridiales; f__Ruminococcaceae; g__uncultured
OTU184	0	0	0	0	0	0	0	7	0	d__Bacteria; p__Firmicutes; c__Clostridia; o__Clostridiales; f__Christensenellaceae; g__Christensenellaceae_R-7_group; s__uncultured_Bacillales_bacterium
OTU185	0	0	0	0	6	0	0	0	0	d__Bacteria; p__Proteobacteria; c__Gammaproteobacteria; o__Xanthomonadales; f__Xanthomonadaceae; g__Dokdonella
OTU186	742	349	23	183	27	137	2	62	1	d__Bacteria; p__Firmicutes; c__Clostridia; o__Clostridiales; f__Lachnospiraceae; g__Anaerostipes; s__Anaerostipes_caccae_DSM_14662
OTU187	0	0	24	0	0	0	0	0	0	d__Bacteria; p__Proteobacteria; c__Gammaproteobacteria; o__Xanthomonadales; f__Xanthomonadaceae; g__Ignatzschineria
OTU188	309	98	0	1	0	0	0	96	0	d__Bacteria; p__Bacteroidetes; c__Bacteroidia; o__Bacteroidales; f__Bacteroidaceae; g__Bacteroides; s__Bacteroides_xylanisolvens
OTU189	0	0	0	0	0	32	0	2	0	d__Bacteria; p__Firmicutes; c__Clostridia; o__Clostridiales; f__Ruminococcaceae; g__Ruminococcaceae_UCG-013
OTU190	1	0	0	0	5	0	0	0	0	d__Bacteria; p__Actinobacteria; c__Actinobacteria; o__Corynebacteriales; f__Mycobacteriaceae; g__Mycobacterium
OTU191	0	0	0	0	0	82	0	0	0	d__Bacteria; p__Firmicutes; c__Clostridia; o__Clostridiales; f__Lachnospiraceae; g__Lachnospiraceae_NK4A136_group
OTU192	0	0	0	0	0	8	0	0	0	d__Bacteria; p__Firmicutes; c__Clostridia; o__Clostridiales; f__Ruminococcaceae
OTU193	0	0	0	0	5	0	0	0	0	d__Bacteria; p__Actinobacteria; c__Actinobacteria; o__Propionibacteriales; f__Propionibacteriaceae; g__Micropruina; s__uncultured_bacterium
OTU194	0	0	513	0	0	49	18	0	0	d__Bacteria; p__Actinobacteria; c__Actinobacteria; o__Micrococcales; f__Micrococcaceae; g__Glutamicibacter
OTU195	0	0	0	0	0	0	0	1	0	d__Bacteria; p__Verrucomicrobia; c__Verrucomicrobiae; o__Verrucomicrobiales; f__Verrucomicrobiaceae; g__Akkermansia
OTU196	0	0	0	3	2	0	0	0	0	d__Bacteria; p__Firmicutes; c__Bacilli; o__Bacillales; f__Staphylococcaceae; g__Nosocomiicoccus; s__uncultured_bacterium
OTU197	0	194	26	1	0	0	0	118	1	d__Bacteria; p__Firmicutes; c__Clostridia; o__Clostridiales; f__Peptostreptococcaceae; g__Peptostreptococcus; s__uncultured_bacterium
OTU198	3	0	0	0	0	0	0	0	0	d__Bacteria; p__Bacteroidetes; c__Bacteroidia; o__Bacteroidales; f__Bacteroidaceae; g__Bacteroides; s__Bacteroides_stercoris_ATCC_43183
OTU199	0	0	0	0	0	2	0	0	0	d__Bacteria; p__Firmicutes; c__Clostridia; o__Clostridiales; f__Ruminococcaceae; g__Ruminococcaceae_NK4A214_group; s__uncultured_rumen_bacterium
OTU200	0	0	0	0	0	5	0	0	0	d__Bacteria; p__Tenericutes; c__Mollicutes; o__Mollicutes_RF9; f__norank; g__norank
OTU201	216	170	2787	76	208	52	16	311	58	d__Bacteria; p__Firmicutes; c__Bacilli; o__Lactobacillales; f__Lactobacillaceae; g__Lactobacillus
OTU202	0	0	0	0	0	10	0	0	0	d__Bacteria; p__Firmicutes; c__Clostridia; o__Clostridiales; f__Ruminococcaceae; g__uncultured; s__[Clostridium]_leptum
OTU203	0	0	6	0	0	0	0	0	0	d__Bacteria; p__Bacteroidetes; c__Sphingobacteriia; o__Sphingobacteriales; f__Sphingobacteriaceae
OTU204	0	0	47	0	0	0	0	0	0	d__Bacteria; p__Firmicutes; c__Erysipelotrichia; o__Erysipelotrichales; f__Erysipelotrichaceae; g__Erysipelothrix; s__uncultured_bacterium
OTU205	0	0	0	0	0	20	0	0	0	d__Bacteria; p__Actinobacteria; c__Actinobacteria; o__Coriobacteriales; f__Coriobacteriaceae; g__Gordonibacter
OTU206	1	7	0	3	1	0	0	0	0	d__Bacteria; p__Firmicutes; c__Bacilli; o__Bacillales; f__Bacillaceae; g__Bacillus
OTU207	0	0	9	1	0	11	0	4	0	d__Bacteria; p__Proteobacteria; c__Alphaproteobacteria; o__Rhodobacterales; f__Rhodobacteraceae
OTU208	0	0	0	0	0	0	4	0	0	d__Bacteria; p__Bacteroidetes; c__Sphingobacteriia; o__Sphingobacteriales; f__Chitinophagaceae
OTU209	11	0	0	0	0	23	18	0	0	d__Bacteria; p__Firmicutes; c__Negativicutes; o__Selenomonadales; f__Veillonellaceae; g__Negativicoccus
OTU210	12	4	0	2	1	20	0	122	0	d__Bacteria; p__Firmicutes; c__Clostridia; o__Clostridiales; f__Lachnospiraceae; g__Eisenbergiella; s__uncultured_organism
OTU211	828	450	111	916	2517	831	790	456	15	d__Bacteria; p__Firmicutes; c__Clostridia; o__Clostridiales; f__Clostridiaceae_1; g__Clostridium_sensu_stricto_1
OTU212	6	0	0	0	0	2	0	5	0	d__Bacteria; p__Firmicutes; c__Clostridia; o__Clostridiales; f__Ruminococcaceae; g__uncultured
OTU213	0	0	30	0	0	0	0	0	0	d__Bacteria; p__Proteobacteria; c__Gammaproteobacteria; o__Aeromonadales; f__Aeromonadaceae; g__Oceanisphaera; s__uncultured_proteobacterium
OTU214	0	0	0	0	0	5	0	0	0	d__Bacteria; p__Firmicutes; c__Clostridia; o__Clostridiales; f__Lachnospiraceae; g__Lachnospiraceae_NK4A136_group; s__uncultured_bacterium
OTU215	1	0	0	0	0	0	0	11	0	d__Bacteria; p__Firmicutes; c__Clostridia; o__Clostridiales; f__Ruminococcaceae
OTU216	1	3	0	0	25	4	0	7	0	d__Bacteria; p__Actinobacteria; c__Actinobacteria; o__Corynebacteriales; f__Nocardiaceae; g__Gordonia
OTU217	32	0	0	2	0	7	13	0	0	d__Bacteria; p__Firmicutes; c__Clostridia; o__Clostridiales; f__Lachnospiraceae; g__Roseburia
OTU218	5764	6028	3937	8011	4490	5571	2502	9381	1574	d__Bacteria; p__Firmicutes; c__Clostridia; o__Clostridiales; f__Peptostreptococcaceae; g__Terrisporobacter; s__uncultured_organism
OTU219	0	0	16	1	0	0	2	1	0	d__Bacteria; p__Actinobacteria; c__Actinobacteria; o__Micrococcales; f__Microbacteriaceae; g__Gulosibacter; s__uncultured_bacterium
OTU220	0	0	0	0	0	4	0	0	0	d__Bacteria; p__Firmicutes; c__Clostridia; o__Clostridiales; f__Ruminococcaceae; g__Ruminococcus_1
OTU221	371	1923	2609	2344	185	21	425	4	0	d__Bacteria; p__Proteobacteria; c__Gammaproteobacteria; o__Enterobacteriales; f__Enterobacteriaceae; g__Morganella
OTU222	0	0	7	0	0	0	0	0	0	d__Bacteria; p__Firmicutes; c__Bacilli; o__Bacillales; f__Bacillaceae
OTU223	0	0	0	0	0	25	0	1	0	d__Bacteria; p__Proteobacteria; c__Gammaproteobacteria; o__Pseudomonadales; f__Moraxellaceae; g__Psychrobacter; s__unidentified_marine_bacterioplankton
OTU224	11	0	0	1	12	15	0	21	0	d__Bacteria; p__Firmicutes; c__Clostridia; o__Clostridiales; f__Ruminococcaceae
OTU225	0	0	4	0	0	0	0	0	0	d__Bacteria; p__Proteobacteria; c__Gammaproteobacteria; o__Pseudomonadales; f__Moraxellaceae; g__Acinetobacter
OTU226	0	0	10	0	0	0	0	0	0	d__Bacteria; p__Firmicutes; c__Erysipelotrichia; o__Erysipelotrichales; f__Erysipelotrichaceae; g__Erysipelothrix; s__Erysipelothrix_rhusiopathiae
OTU227	0	0	0	0	0	9	0	0	0	d__Bacteria; p__Bacteroidetes; c__Bacteroidia; o__Bacteroidales; f__Porphyromonadaceae; g__Porphyromonas; s__Porphyromonas_somerae
OTU228	0	0	9	0	0	0	0	0	0	d__Bacteria; p__Firmicutes; c__Clostridia; o__Clostridiales; f__Family_XI
OTU229	38	3	0	3	1	13	0	8	0	d__Bacteria; p__Firmicutes; c__Clostridia; o__Clostridiales; f__Family_XIII
OTU230	852	1158	135	700	3052	612	449	787	49	d__Bacteria; p__Firmicutes; c__Clostridia; o__Clostridiales; f__Clostridiaceae_1; g__Clostridium_sensu_stricto_1
OTU231	0	0	3	0	0	0	0	0	0	d__Bacteria; p__Proteobacteria; c__Betaproteobacteria; o__Burkholderiales; f__Alcaligenaceae; g__Parapusillimonas; s__uncultured_bacterium
OTU232	7	0	0	0	0	0	0	0	0	d__Bacteria; p__Firmicutes; c__Negativicutes; o__Selenomonadales; f__Acidaminococcaceae; g__Phascolarctobacterium; s__uncultured_organism
OTU233	0	0	0	0	0	0	0	2	0	d__Bacteria; p__Actinobacteria; c__Actinobacteria; o__Micrococcales; f__Brevibacteriaceae; g__Brevibacterium; s__Brevibacterium_ravenspurgense
OTU234	0	0	0	0	0	2	0	0	0	d__Bacteria; p__Firmicutes; c__Clostridia; o__Clostridiales; f__Ruminococcaceae; g__Ruminococcaceae_UCG-014; s__unidentified
OTU235	0	0	0	0	0	38	0	0	0	d__Bacteria; p__Firmicutes; c__Clostridia; o__Clostridiales; f__Ruminococcaceae; g__Ruminococcaceae_UCG-005
OTU236	27	0	0	0	0	0	0	0	0	d__Bacteria; p__Actinobacteria; c__Actinobacteria; o__Bifidobacteriales; f__Bifidobacteriaceae; g__Bifidobacterium; s__Bifidobacterium_pseudolongum_PV8-2
OTU237	1	0	17	12	0	1	1	37	11	d__Bacteria; p__Firmicutes; c__Bacilli; o__Bacillales; f__Staphylococcaceae; g__Staphylococcus; s__Staphylococcus_pettenkoferi
OTU238	2	10	37	7	4	7	1	166	2	d__Bacteria; p__Actinobacteria; c__Actinobacteria; o__Micrococcales; f__Micrococcaceae; g__Kocuria
OTU239	0	1	0	0	0	0	0	3	4	d__Bacteria; p__Actinobacteria; c__Actinobacteria; o__Corynebacteriales; f__Corynebacteriaceae; g__Corynebacterium_1
OTU240	253	26	2	122	1491	31	3266	2437	985	d__Bacteria; p__Firmicutes; c__Clostridia; o__Clostridiales; f__Clostridiaceae_1; g__Clostridium_sensu_stricto_1
OTU241	0	0	503	0	0	2	0	0	0	d__Bacteria; p__Firmicutes; c__Clostridia; o__Clostridiales; f__Family_XI; g__Tissierella
OTU242	0	0	0	0	0	3	0	0	0	d__Bacteria; p__Firmicutes; c__Clostridia; o__Clostridiales; f__Family_XI
OTU243	0	0	95	0	0	0	2	0	0	d__Bacteria; p__Proteobacteria; c__Betaproteobacteria; o__Burkholderiales; f__Comamonadaceae; g__Comamonas; s__Comamonas_kerstersii
OTU244	0	0	0	0	0	0	2	0	0	d__Bacteria; p__Actinobacteria; c__Actinobacteria; o__Corynebacteriales; f__Corynebacteriaceae; g__Corynebacterium
OTU245	23	2	0	0	68	10	0	24	0	d__Bacteria; p__Firmicutes; c__Clostridia; o__Clostridiales; f__Lachnospiraceae
OTU246	0	0	0	0	0	24	0	0	0	d__Bacteria; p__Actinobacteria; c__Actinobacteria; o__Coriobacteriales; f__Coriobacteriaceae; g__uncultured; s__uncultured_bacterium
OTU247	1	7	0	0	0	24	10	0	0	d__Bacteria; p__Proteobacteria; c__Betaproteobacteria; o__Burkholderiales; f__Alcaligenaceae; g__Sutterella
OTU248	34	137	0	3	584	90	3	65	1	d__Bacteria; p__Firmicutes; c__Clostridia; o__Clostridiales; f__Lachnospiraceae
OTU249	1	0	0	0	0	1	0	19	0	d__Bacteria; p__Bacteroidetes; c__Bacteroidia; o__Bacteroidales; f__Porphyromonadaceae; g__Parabacteroides; s__Parabacteroides_distasonis_ATCC_8503
OTU250	0	0	0	0	0	29	0	0	0	d__Bacteria; p__Firmicutes; c__Clostridia; o__Clostridiales; f__Ruminococcaceae; g__Ruminiclostridium_5
OTU251	0	0	0	0	0	57	0	2	0	d__Bacteria; p__Proteobacteria; c__Deltaproteobacteria; o__Desulfovibrionales; f__Desulfovibrionaceae; g__Bilophila; s__Bilophila_wadsworthia
OTU252	0	0	24	0	0	0	0	0	0	d__Bacteria; p__Actinobacteria; c__Actinobacteria; o__Micrococcales; f__Microbacteriaceae; g__Leucobacter
OTU253	0	0	0	0	0	4	0	0	0	d__Bacteria; p__Firmicutes; c__Clostridia; o__Clostridiales; f__Ruminococcaceae; g__Ruminiclostridium; s__uncultured_bacterium
OTU254	0	0	0	0	0	5	0	0	0	d__Bacteria; p__Bacteroidetes; c__Bacteroidia; o__Bacteroidales; f__Porphyromonadaceae; g__Porphyromonas
OTU256	0	0	32	0	0	11	0	2	0	d__Bacteria; p__Actinobacteria; c__Actinobacteria; o__Actinomycetales; f__Actinomycetaceae; g__Flaviflexus; s__uncultured_bacterium
OTU257	0	0	0	0	0	17	0	0	0	d__Bacteria; p__Bacteroidetes; c__Flavobacteriia; o__Flavobacteriales; f__Flavobacteriaceae; g__Aequorivita; s__uncultured_Flavobacteriia_bacterium
OTU258	0	0	13	0	0	0	0	0	0	d__Bacteria; p__Bacteroidetes; c__Flavobacteriia; o__Flavobacteriales; f__Flavobacteriaceae; g__Myroides; s__uncultured_bacterium
OTU259	10	9	0	20	64	7	0	41	0	d__Bacteria; p__Firmicutes; c__Erysipelotrichia; o__Erysipelotrichales; f__Erysipelotrichaceae; g__Erysipelatoclostridium; s__Clostridiaceae_bacterium_GM1
OTU260	1	1	0	0	1	0	0	1	0	d__Bacteria; p__Firmicutes; c__Bacilli; o__Lactobacillales; f__Carnobacteriaceae; g__Pisciglobus; s__uncultured_bacterium
OTU261	0	0	54	0	0	0	0	0	0	d__Bacteria; p__Proteobacteria; c__Betaproteobacteria; o__Burkholderiales; f__Alcaligenaceae; g__Paenalcaligenes
OTU262	0	0	0	0	0	23	0	0	0	d__Bacteria; p__Firmicutes; c__Clostridia; o__Clostridiales; f__Christensenellaceae; g__Christensenellaceae_R-7_group
OTU263	0	1	0	0	0	7	0	63	0	d__Bacteria; p__Firmicutes; c__Clostridia; o__Clostridiales; f__Lachnospiraceae; g__Lachnoclostridium; s__[Clostridium]_scindens
OTU264	1	0	0	2	0	3	0	0	0	d__Bacteria; p__Firmicutes; c__Clostridia; o__Clostridiales; f__Family_XI; g__Anaerococcus
OTU265	0	0	0	0	3	0	0	0	0	d__Bacteria; p__Actinobacteria; c__Actinobacteria; o__Propionibacteriales; f__Propionibacteriaceae; g__Propioniciclava; s__uncultured_bacterium
OTU266	0	0	134	0	0	0	12	0	0	d__Bacteria; p__Proteobacteria; c__Alphaproteobacteria; o__Rhizobiales; f__Brucellaceae; g__Pseudochrobactrum; s__Pseudochrobactrum_saccharolyticum
OTU267	0	0	0	0	0	9	0	0	0	d__Bacteria; p__Firmicutes; c__Clostridia; o__Clostridiales; f__Lachnospiraceae; g__uncultured
OTU268	86	11	0	13	0	46	2	8	0	d__Bacteria; p__Firmicutes; c__Clostridia; o__Clostridiales; f__Peptococcaceae; g__Peptococcus
OTU269	0	0	0	0	0	0	4	0	0	d__Bacteria; p__Actinobacteria; c__Actinobacteria; o__Propionibacteriales; f__Nocardioidaceae; g__Nocardioides
OTU270	0	0	28	0	0	3	0	0	0	d__Bacteria; p__Firmicutes; c__Bacilli; o__Lactobacillales; f__Carnobacteriaceae; g__Atopostipes; s__uncultured_bacterium
OTU271	0	0	0	0	0	0	0	16	0	d__Bacteria; p__Planctomycetes; c__Planctomycetacia; o__Planctomycetales; f__Planctomycetaceae; g__Isosphaera; s__uncultured_bacterium
OTU272	0	0	3	0	0	0	0	1	0	d__Bacteria; p__Proteobacteria; c__Alphaproteobacteria; o__Rhizobiales; f__Rhizobiales_Incertae_Sedis; g__Agaricicola
OTU273	61	40	0	0	0	3	0	64	1	d__Bacteria; p__Bacteroidetes; c__Bacteroidia; o__Bacteroidales; f__Bacteroidaceae; g__Bacteroides
OTU274	0	0	0	0	0	8	0	0	0	d__Bacteria; p__Firmicutes; c__Clostridia; o__Clostridiales; f__Ruminococcaceae; g__Ruminococcaceae_UCG-005
OTU275	0	0	0	0	0	0	0	0	4	d__Bacteria; p__Deinococcus-Thermus; c__Deinococci; o__Deinococcales; f__Deinococcaceae; g__Deinococcus; s__unidentified
OTU276	0	0	0	0	0	8	0	0	0	d__Bacteria; p__Firmicutes; c__Clostridia; o__Clostridiales; f__Lachnospiraceae; g__[Eubacterium]_ventriosum_group
OTU277	0	0	0	0	0	2	0	0	0	d__Bacteria; p__Bacteroidetes; c__Bacteroidia; o__Bacteroidales; f__Porphyromonadaceae; g__Parabacteroides; s__Parabacteroides_merdae
OTU278	0	0	0	0	0	0	0	1	0	d__Bacteria; p__Actinobacteria; c__Actinobacteria; o__Coriobacteriales; f__Coriobacteriaceae; g__uncultured; s__Enterococcus_casseliflavus
OTU279	0	0	4	0	0	0	0	0	0	d__Bacteria; p__Proteobacteria; c__Betaproteobacteria; o__Burkholderiales; f__Alcaligenaceae
OTU280	1	0	0	0	0	3	0	0	0	d__Bacteria; p__Firmicutes; c__Erysipelotrichia; o__Erysipelotrichales; f__Erysipelotrichaceae
OTU281	43	36	0	14	28	3	0	22	0	d__Bacteria; p__Firmicutes; c__Clostridia; o__Clostridiales; f__Ruminococcaceae; g__Candidatus_Soleaferrea; s__uncultured_organism
OTU282	1368	2191	102	958	640	810	1293	611	130	d__Bacteria; p__Firmicutes; c__Clostridia; o__Clostridiales; f__Clostridiaceae_1; g__Clostridium_sensu_stricto_13; s__Clostridium_sp._CL-6
OTU283	10	5	0	0	0	0	0	0	0	d__Bacteria; p__Firmicutes; c__Clostridia; o__Clostridiales; f__Ruminococcaceae
OTU284	0	0	0	0	0	3	0	0	0	d__Bacteria; p__Firmicutes; c__Clostridia; o__Clostridiales; f__Lachnospiraceae; g__Coprococcus_1; s__uncultured_bacterium
OTU285	0	0	2	3	0	0	1	0	0	d__Bacteria; p__Firmicutes; c__Clostridia; o__Clostridiales; f__Family_XI; g__Gallicola; s__uncultured_bacterium
OTU286	0	0	0	0	0	0	0	5	0	d__Bacteria; p__Firmicutes; c__Clostridia; o__Clostridiales; f__Ruminococcaceae; g__Ruminiclostridium_9
OTU287	0	0	0	0	0	0	0	2	0	d__Bacteria; p__Firmicutes; c__Clostridia; o__Clostridiales; f__Lachnospiraceae
OTU288	0	4	0	0	102	0	0	119	1	d__Bacteria; p__Actinobacteria; c__Actinobacteria; o__Coriobacteriales; f__Coriobacteriaceae; g__Slackia; s__uncultured_bacterium
OTU289	0	0	16	0	0	0	0	0	0	d__Bacteria; p__Firmicutes; c__Clostridia; o__Clostridiales; f__Lachnospiraceae; g__uncultured; s__uncultured_prokaryote
OTU290	9	53	0	3	52	22	0	5	0	d__Bacteria; p__Firmicutes; c__Clostridia; o__Clostridiales; f__Lachnospiraceae; g__Lachnoclostridium; s__[Clostridium]_symbiosum
OTU291	0	0	0	0	44	0	0	0	0	d__Bacteria; p__Chloroflexi; c__Thermomicrobia; o__JG30-KF-CM45; f__norank; g__norank; s__uncultured_Thermomicrobium_sp.
OTU292	0	0	14	0	0	0	0	0	0	d__Bacteria; p__Bacteroidetes; c__Bacteroidia; o__Bacteroidales
OTU293	0	0	0	0	0	1	0	0	0	d__Bacteria; p__Bacteroidetes; c__Flavobacteriia; o__Flavobacteriales; f__Flavobacteriaceae; g__Moheibacter
OTU294	0	0	35	0	0	0	0	0	0	d__Bacteria; p__Firmicutes; c__Bacilli; o__Bacillales; f__Bacillaceae; g__Pseudogracilibacillus; s__uncultured_bacterium
OTU295	0	0	0	0	0	21	0	0	0	d__Bacteria; p__Firmicutes; c__Clostridia; o__Clostridiales; f__Ruminococcaceae; g__Ruminococcaceae_UCG-013
OTU296	0	0	19	0	0	0	0	0	0	d__Bacteria; p__Proteobacteria; c__Betaproteobacteria; o__Burkholderiales; f__Alcaligenaceae; g__Pusillimonas
OTU297	0	0	0	0	0	0	0	8	0	d__Bacteria; p__Firmicutes; c__Clostridia; o__Clostridiales; f__Christensenellaceae; g__Christensenellaceae_R-7_group; s__Clostridiales_bacterium_Marseille-P2846
OTU298	146	214	16	146	210	130	62	41	0	d__Bacteria; p__Firmicutes; c__Clostridia; o__Clostridiales; f__Lachnospiraceae; g__Cellulosilyticum
OTU299	1	0	0	0	0	39	0	3	0	d__Bacteria; p__Actinobacteria; c__Actinobacteria; o__Micrococcales; f__Dermatophilaceae; g__Mobilicoccus
OTU300	0	0	0	0	0	0	9	0	0	d__Bacteria; p__Fusobacteria; c__Fusobacteriia; o__Fusobacteriales; f__Fusobacteriaceae; g__Cetobacterium; s__uncultured_bacterium
OTU301	2	0	0	0	0	0	0	6	0	d__Bacteria; p__Firmicutes; c__Clostridia; o__Clostridiales; f__Ruminococcaceae
OTU302	2	9	247	8	29	82	24	146	1	d__Bacteria; p__Actinobacteria; c__Actinobacteria; o__Corynebacteriales; f__Corynebacteriaceae; g__Corynebacterium; s__Corynebacterium_humireducens_NBRC_106098_=_DSM_45392
OTU303	113	0	0	4	0	120	12	5	0	d__Bacteria; p__Firmicutes; c__Clostridia; o__Clostridiales; f__Ruminococcaceae; g__Ruminiclostridium_5; s__uncultured_bacterium
OTU304	0	0	42	0	0	0	0	0	0	d__Bacteria; p__Firmicutes; c__Bacilli; o__Bacillales; f__Bacillaceae; g__Bacillus; s__Bacillus_lentus
OTU305	0	0	0	0	0	0	0	32	0	d__Bacteria; p__Actinobacteria; c__Actinobacteria; o__Pseudonocardiales; f__Pseudonocardiaceae; g__Saccharopolyspora
OTU306	0	0	0	0	0	50	0	0	0	d__Bacteria; p__Firmicutes; c__Clostridia; o__Clostridiales; f__Lachnospiraceae; g__Lachnospiraceae_NK4A136_group
OTU307	2	0	0	0	0	0	0	10	0	d__Bacteria; p__Firmicutes; c__Clostridia; o__Clostridiales; f__Ruminococcaceae; g__[Eubacterium]_coprostanoligenes_group
OTU308	0	0	0	0	0	22	0	0	0	d__Bacteria; p__Firmicutes; c__Clostridia; o__Clostridiales; f__Ruminococcaceae; g__Ruminiclostridium_6; s__uncultured_bacterium
OTU309	0	0	3	0	0	0	0	0	0	d__Bacteria; p__Firmicutes; c__Erysipelotrichia; o__Erysipelotrichales; f__Erysipelotrichaceae; g__Erysipelothrix; s__uncultured_bacterium
OTU310	118	105	0	32	78	11	2	63	0	d__Bacteria; p__Firmicutes; c__Erysipelotrichia; o__Erysipelotrichales; f__Erysipelotrichaceae; g__[Clostridium]_innocuum_group; s__uncultured_bacterium
OTU311	0	0	0	0	1	0	0	12	0	d__Bacteria; p__Firmicutes; c__Erysipelotrichia; o__Erysipelotrichales; f__Erysipelotrichaceae; g__Faecalitalea; s__unidentified
OTU312	0	0	0	0	0	0	0	2	0	d__Bacteria; p__Actinobacteria; c__Actinobacteria; o__Frankiales; f__Geodermatophilaceae; g__Geodermatophilus; s__uncultured_bacterium
OTU313	3	1	79	0	0	94	34	36	1	d__Bacteria; p__Actinobacteria; c__Actinobacteria; o__Corynebacteriales; f__Corynebacteriaceae; g__Corynebacterium_1; s__Corynebacterium_glutamicum
OTU314	0	0	8	0	0	0	0	0	0	d__Bacteria; p__Proteobacteria; c__Alphaproteobacteria; o__Sphingomonadales; f__Sphingomonadaceae; g__Sandaracinobacter; s__uncultured_bacterium
OTU315	0	2	4	0	0	4	3	0	0	d__Bacteria; p__Bacteroidetes; c__Sphingobacteriia; o__Sphingobacteriales; f__Sphingobacteriaceae; g__Sphingobacterium; s__Sphingobacterium_sp._D1
OTU316	0	0	0	0	0	19	0	0	0	d__Bacteria; p__Firmicutes; c__Clostridia; o__Clostridiales; f__Ruminococcaceae; g__Anaerotruncus
OTU317	177	200	26	84	374	156	17	158	0	d__Bacteria; p__Firmicutes; c__Clostridia; o__Clostridiales; f__Lachnospiraceae
OTU318	0	0	19	0	0	0	0	0	0	d__Bacteria; p__Firmicutes; c__Clostridia; o__Clostridiales; f__Peptostreptococcaceae; g__Proteocatella; s__Frigovirgula_sp._canine_oral_taxon_032
OTU319	0	2	0	0	0	0	0	2	0	d__Bacteria; p__Actinobacteria; c__Actinobacteria; o__Actinomycetales; f__Actinomycetaceae; g__Actinomyces; s__Actinomyces_nasicola
OTU320	0	0	0	0	0	2	0	0	0	d__Bacteria; p__Firmicutes; c__Clostridia; o__Clostridiales; f__Lachnospiraceae
OTU321	0	0	0	0	0	8	0	0	0	d__Bacteria; p__Firmicutes; c__Clostridia; o__Clostridiales; f__Family_XIII; g__[Eubacterium]_brachy_group; s__uncultured_Eubacteriaceae_bacterium
OTU322	0	0	0	0	0	0	4	0	0	d__Bacteria; p__Proteobacteria; c__Gammaproteobacteria; o__Xanthomonadales; f__Xanthomonadaceae; g__Thermomonas; s__uncultured_bacterium
OTU323	0	0	0	0	0	0	0	2	0	d__Bacteria; p__Firmicutes; c__Clostridia; o__Clostridiales; f__Family_XI; g__uncultured; s__uncultured_prokaryote
OTU324	3	0	0	1	0	0	0	1	0	d__Bacteria; p__Firmicutes; c__Clostridia; o__Clostridiales; f__Ruminococcaceae; g__Ruminiclostridium_5
OTU325	1	0	0	0	0	0	7	0	0	d__Bacteria; p__Firmicutes; c__Clostridia; o__Clostridiales; f__Family_XIII; g__uncultured; s__uncultured_Anaerovorax_sp.
OTU326	0	0	0	0	0	20	0	0	0	d__Bacteria; p__Bacteroidetes; c__Flavobacteriia; o__Flavobacteriales; f__Flavobacteriaceae
OTU327	0	1	0	1	1	0	0	31	0	d__Bacteria; p__Firmicutes; c__Bacilli; o__Bacillales; f__Staphylococcaceae; g__Staphylococcus; s__Staphylococcus_lentus
OTU328	83	2	0	2	1	18	0	24	0	d__Bacteria; p__Firmicutes; c__Clostridia; o__Clostridiales; f__Ruminococcaceae; g__Ruminiclostridium_9; s__uncultured_bacterium
OTU329	0	0	3	0	0	0	0	2	0	d__Bacteria; p__Actinobacteria; c__Actinobacteria; o__Propionibacteriales; f__Propionibacteriaceae
OTU330	0	0	228	0	0	12	0	0	0	d__Bacteria; p__Proteobacteria; c__Gammaproteobacteria; o__Xanthomonadales; f__Xanthomonadaceae; g__Stenotrophomonas
OTU331	0	0	11	0	0	0	0	0	0	d__Bacteria; p__Bacteroidetes; c__Flavobacteriia; o__Flavobacteriales; f__Flavobacteriaceae; g__Myroides; s__uncultured_bacterium
OTU332	19	4	0	26	0	0	0	9	0	d__Bacteria; p__Firmicutes; c__Clostridia; o__Clostridiales; f__Peptostreptococcaceae
OTU333	0	3	38	0	0	0	0	0	0	d__Bacteria; p__Bacteroidetes; c__Bacteroidia; o__Bacteroidales; f__Bacteroidaceae; g__Bacteroides
OTU334	0	0	298	0	0	0	2	0	0	d__Bacteria; p__Proteobacteria; c__Gammaproteobacteria; o__Xanthomonadales; f__Xanthomonadaceae; g__Koukoulia; s__uncultured_bacterium
OTU335	0	1	0	0	0	0	0	7	0	d__Bacteria; p__Firmicutes; c__Clostridia; o__Clostridiales; f__Ruminococcaceae
OTU336	0	0	0	0	0	7	0	0	0	d__Bacteria; p__Firmicutes; c__Clostridia; o__Clostridiales; f__Lachnospiraceae; g__Lachnospiraceae_NK4A136_group; s__uncultured_bacterium
OTU337	4	26	0	0	2	4	0	2	0	d__Bacteria; p__Firmicutes; c__Clostridia; o__Clostridiales; f__Lachnospiraceae; g__Lachnospiraceae_UCG-010; s__uncultured_bacterium
OTU338	20	7	0	12	2220	46	0	19	0	d__Bacteria; p__Firmicutes; c__Clostridia; o__Clostridiales; f__Clostridiaceae_1; g__Clostridium_sensu_stricto_1
OTU339	0	0	0	0	0	0	0	0	206	d__Bacteria; p__Proteobacteria; c__Alphaproteobacteria; o__Rickettsiales; f__Mitochondria; g__norank
OTU340	0	0	0	0	0	0	0	3	0	d__Bacteria; p__Firmicutes; c__Clostridia; o__Clostridiales; f__Ruminococcaceae; g__Ruminococcaceae_UCG-013; s__uncultured_bacterium
OTU341	0	0	0	0	0	25	0	0	0	d__Bacteria; p__Proteobacteria; c__Gammaproteobacteria; o__Pseudomonadales; f__Moraxellaceae; g__Alkanindiges
OTU342	0	0	0	0	0	15	0	2	0	d__Bacteria; p__Firmicutes; c__Clostridia; o__Clostridiales; f__Lachnospiraceae
OTU343	5	0	0	0	0	4	0	0	0	d__Bacteria; p__Firmicutes; c__Clostridia; o__Clostridiales; f__Ruminococcaceae; g__Candidatus_Soleaferrea
OTU344	0	0	0	0	0	5	0	0	0	d__Bacteria; p__Bacteroidetes; c__Flavobacteriia; o__Flavobacteriales; f__Flavobacteriaceae; g__Flavobacterium; s__uncultured_bacterium
OTU345	30	9	0	3	19	25	0	28	0	d__Bacteria; p__Firmicutes; c__Clostridia; o__Clostridiales; f__Ruminococcaceae; g__Anaerotruncus; s__uncultured_organism
OTU346	4	3	0	1	13	19	0	2	0	d__Bacteria; p__Firmicutes; c__Clostridia; o__Clostridiales; f__Lachnospiraceae
OTU347	0	0	65	0	0	0	32	0	0	d__Bacteria; p__Proteobacteria; c__Betaproteobacteria; o__Burkholderiales; f__Comamonadaceae; g__Comamonas; s__Comamonas_testosteroni
OTU348	0	0	0	0	0	0	0	3	0	d__Bacteria; p__Firmicutes; c__Clostridia; o__Clostridiales; f__Ruminococcaceae; g__Ruminococcaceae_UCG-013; s__uncultured_bacterium
OTU349	0	0	9	0	0	0	0	0	0	d__Bacteria; p__Firmicutes; c__Bacilli; o__Bacillales; f__Paenibacillaceae; g__Cohnella; s__uncultured_bacterium
OTU350	0	0	95	0	0	0	0	0	0	d__Bacteria; p__Firmicutes; c__Erysipelotrichia; o__Erysipelotrichales; f__Erysipelotrichaceae; g__Erysipelothrix; s__uncultured_bacterium
OTU351	1	0	0	0	0	0	0	0	0	d__Bacteria; p__Proteobacteria; c__Betaproteobacteria; o__Burkholderiales; f__Alcaligenaceae; g__Sutterella; s__gut_metagenome
OTU352	0	0	5	0	0	0	0	0	0	d__Bacteria; p__Proteobacteria; c__Alphaproteobacteria; o__Rhodobacterales; f__Rhodobacteraceae
OTU353	0	0	0	0	3	0	0	0	0	d__Bacteria; p__Actinobacteria; c__Actinobacteria; o__Frankiales; f__Nakamurellaceae; g__Nakamurella; s__uncultured_bacterium
OTU354	2	0	0	0	0	216	0	0	0	d__Bacteria; p__Bacteroidetes; c__Bacteroidia; o__Bacteroidales; f__Porphyromonadaceae; g__Porphyromonas; s__Porphyromonas_asaccharolytica
OTU355	0	0	0	0	46	6	0	0	1	d__Bacteria; p__Firmicutes; c__Bacilli; o__Lactobacillales; f__Lactobacillaceae; g__Lactobacillus
OTU356	0	0	17	0	0	0	0	0	0	d__Bacteria; p__Bacteroidetes; c__Flavobacteriia; o__Flavobacteriales; f__Cryomorphaceae; g__Fluviicola; s__uncultured_Fluviicola_sp.
OTU357	17388	2559	69	2454	5295	274	23027	3086	7566	d__Bacteria; p__Proteobacteria; c__Gammaproteobacteria; o__Enterobacteriales; f__Enterobacteriaceae; g__Escherichia-Shigella
OTU358	0	0	0	0	0	0	0	4	0	d__Bacteria; p__Bacteroidetes; c__Bacteroidia; o__Bacteroidales; f__Bacteroidaceae; g__Bacteroides; s__Bacteroides_uniformis
OTU359	1	2	239	2	0	54	20	158	0	d__Bacteria; p__Actinobacteria; c__Actinobacteria; o__Corynebacteriales; f__Dietziaceae; g__Dietzia
OTU360	0	0	0	0	0	0	0	5	0	d__Bacteria; p__Firmicutes; c__Clostridia; o__Clostridiales
OTU361	0	0	0	0	0	0	0	2	0	d__Bacteria; p__Firmicutes; c__Clostridia; o__Clostridiales; f__Ruminococcaceae; g__Acetanaerobacterium; s__uncultured_rumen_bacterium
OTU362	1	8	152	1	69	289	50	7	91	d__Bacteria; p__Proteobacteria; c__Betaproteobacteria; o__Burkholderiales; f__Burkholderiaceae; g__Ralstonia; s__unidentified_marine_bacterioplankton
OTU363	0	0	22	0	0	0	0	0	0	d__Bacteria; p__Proteobacteria; c__Betaproteobacteria; o__Burkholderiales; f__Alcaligenaceae
OTU364	1765	1600	450	2839	3209	2496	2359	2947	3640	d__Bacteria; p__Firmicutes; c__Clostridia; o__Clostridiales; f__Clostridiaceae_1; g__Clostridium_sensu_stricto_1
OTU365	15	14	0	9	12	2	0	2	0	d__Bacteria; p__Firmicutes; c__Clostridia; o__Clostridiales; f__Lachnospiraceae; g__Tyzzerella; s__uncultured_Firmicutes_bacterium
OTU366	431	375	27	695	584	680	558	854	30	d__Bacteria; p__Firmicutes; c__Clostridia; o__Clostridiales; f__Lachnospiraceae; g__Cellulosilyticum; s__uncultured_bacterium
OTU367	0	23	32	3	3	52	4	38	1	d__Bacteria; p__Firmicutes; c__Bacilli; o__Bacillales; f__Staphylococcaceae; g__Jeotgalicoccus; s__Jeotgalicoccus_sp._M3T9B12
OTU368	0	0	0	0	0	0	0	0	6	d__Bacteria; p__Proteobacteria; c__Gammaproteobacteria; o__Xanthomonadales; f__Xanthomonadaceae; g__Lysobacter; s__Lysobacter_gummosus
OTU369	0	0	0	0	0	49	0	0	0	d__Bacteria; p__Firmicutes; c__Clostridia; o__Clostridiales; f__Ruminococcaceae
OTU370	2610	2177	95	471	6053	1417	837	2011	127	d__Bacteria; p__Firmicutes; c__Clostridia; o__Clostridiales; f__Clostridiaceae_1; g__Clostridium_sensu_stricto_1
OTU371	0	0	10	0	0	0	3	0	0	d__Bacteria; p__Proteobacteria; c__Gammaproteobacteria; o__Pseudomonadales; f__Moraxellaceae; g__Acinetobacter
OTU372	3	0	0	0	2	6	0	1	0	d__Bacteria; p__Firmicutes; c__Clostridia; o__Clostridiales; f__Ruminococcaceae; g__[Eubacterium]_coprostanoligenes_group
OTU373	0	0	0	0	0	1	8	5	1	d__Bacteria; p__Actinobacteria; c__Actinobacteria; o__Corynebacteriales; f__Corynebacteriaceae; g__Corynebacterium_1
OTU374	60	47	596	30	140	35	12	130	137	d__Bacteria; p__Firmicutes; c__Bacilli; o__Bacillales; f__Bacillaceae; g__Geobacillus; s__Geobacillus_stearothermophilus
OTU375	0	0	0	0	0	35	0	0	0	d__Bacteria; p__Firmicutes; c__Erysipelotrichia; o__Erysipelotrichales; f__Erysipelotrichaceae; g__Allobaculum
OTU376	0	0	38	0	0	0	0	2	0	d__Bacteria; p__Actinobacteria; c__Actinobacteria; o__Micrococcales; f__Micrococcaceae; g__Enteractinococcus; s__Enteractinococcus_sp._YIM_101632
OTU377	0	0	984	0	0	0	0	0	0	d__Bacteria; p__Firmicutes; c__Clostridia; o__Clostridiales; f__Family_XI; g__Tissierella; s__uncultured_Tissierella_sp.
OTU378	0	0	0	0	0	20	0	0	0	d__Bacteria; p__Firmicutes; c__Clostridia; o__Clostridiales; f__Ruminococcaceae; g__Oscillibacter; s__uncultured_bacterium
OTU379	0	0	31	0	0	0	4	0	0	d__Bacteria; p__Bacteroidetes; c__Flavobacteriia; o__Flavobacteriales; f__Flavobacteriaceae
OTU380	7	3	0	0	0	7	0	0	0	d__Bacteria; p__Firmicutes; c__Clostridia; o__Clostridiales; f__Ruminococcaceae; g__Anaerotruncus; s__uncultured_bacterium
OTU381	4	33	0	1	0	20	0	0	0	d__Bacteria; p__Firmicutes; c__Clostridia; o__Clostridiales; f__Clostridiaceae_1
OTU382	0	0	0	0	0	4	0	0	0	d__Bacteria; p__Bacteroidetes; c__Bacteroidia; o__Bacteroidales; f__Prevotellaceae; g__Prevotella_7
OTU383	0	0	10	0	0	0	0	0	0	d__Bacteria; p__Bacteroidetes; c__Flavobacteriia; o__Flavobacteriales; f__Flavobacteriaceae; g__Myroides; s__Myroides_odoratus
OTU384	99	4	0	5	10	284	0	133	0	d__Bacteria; p__Firmicutes; c__Clostridia; o__Clostridiales; f__Ruminococcaceae; g__Candidatus_Soleaferrea; s__Ruminococcaceae_bacterium_GD6
OTU385	0	0	11	0	0	0	0	0	0	d__Bacteria; p__Actinobacteria; c__Actinobacteria; o__Micrococcales; f__Micrococcaceae; g__Glutamicibacter; s__uncultured_bacterium
OTU386	2	0	0	0	0	0	0	0	0	d__Bacteria; p__Firmicutes; c__Clostridia; o__Clostridiales; f__Family_XI; g__Murdochiella; s__unidentified
OTU387	159	102	0	27	265	31	1	46	0	d__Bacteria; p__Firmicutes; c__Clostridia; o__Clostridiales; f__Lachnospiraceae; g__Lachnoclostridium; s__gut_metagenome
OTU388	0	0	0	0	0	1	0	0	0	d__Bacteria; p__Firmicutes; c__Clostridia; o__Clostridiales; f__Ruminococcaceae; g__Ruminococcus_1; s__unidentified
OTU389	0	0	24	0	0	0	0	0	0	d__Bacteria; p__Bacteroidetes; c__Sphingobacteriia; o__Sphingobacteriales; f__Sphingobacteriaceae; g__Sphingobacterium; s__uncultured_bacterium
OTU390	1	0	0	1	0	14	14	0	0	d__Bacteria; p__Firmicutes; c__Clostridia; o__Clostridiales; f__Family_XI; g__Peptoniphilus
OTU391	0	0	124	0	0	0	0	0	0	d__Bacteria; p__Proteobacteria; c__Gammaproteobacteria; o__Pseudomonadales; f__Pseudomonadaceae; g__Pseudomonas; s__Pseudomonas_sp._108Z1
OTU392	0	0	407	0	0	0	0	0	0	d__Bacteria; p__Firmicutes; c__Bacilli; o__Bacillales; f__Bacillaceae; g__Amphibacillus; s__uncultured_bacterium
OTU393	0	0	0	0	0	887	0	2	0	d__Bacteria; p__Firmicutes; c__Bacilli; o__Lactobacillales; f__Lactobacillaceae; g__Lactobacillus; s__Lactobacillus_reuteri
OTU394	0	0	0	0	0	5	0	1	0	d__Bacteria; p__Actinobacteria; c__Actinobacteria; o__Propionibacteriales; f__Propionibacteriaceae; g__Tessaracoccus; s__uncultured_bacterium
OTU395	0	0	0	0	0	27	0	0	0	d__Bacteria; p__BRC1; c__norank; o__norank; f__norank; g__norank
OTU396	0	0	0	0	0	43	0	0	0	d__Bacteria; p__Bacteroidetes; c__Bacteroidia; o__Bacteroidales; f__Bacteroidales_S24-7_group; g__norank; s__uncultured_bacterium
OTU397	25	28	26	6	141	105	5	1	0	d__Bacteria; p__Firmicutes; c__Clostridia; o__Clostridiales; f__Lachnospiraceae; g__Mobilitalea; s__Clostridium_sp._Marseille-P299
OTU398	2	4	40	7	4	72	2	59	7	d__Bacteria; p__Actinobacteria; c__Actinobacteria; o__Corynebacteriales; f__Corynebacteriaceae; g__Corynebacterium_1
OTU399	0	0	35	0	0	0	0	0	0	d__Bacteria; p__Firmicutes; c__Clostridia; o__Clostridiales; f__Family_XI
OTU400	0	0	0	0	0	59	0	0	0	d__Bacteria; p__Bacteroidetes; c__Bacteroidia; o__Bacteroidales; f__Prevotellaceae; g__Prevotella_1; s__uncultured_bacterium
OTU401	9	3	0	2	0	6	0	7	0	d__Bacteria; p__Firmicutes; c__Erysipelotrichia; o__Erysipelotrichales; f__Erysipelotrichaceae
OTU402	0	0	53	0	0	0	0	0	0	d__Bacteria; p__Proteobacteria; c__Alphaproteobacteria; o__Sphingomonadales; f__Sphingomonadaceae; g__Sphingopyxis
OTU403	10	41	1411	8	438	2140	372	36	879	d__Bacteria; p__Actinobacteria; c__Actinobacteria; o__Corynebacteriales; f__Nocardiaceae; g__Rhodococcus
OTU404	0	0	0	0	0	0	4	0	0	d__Bacteria; p__Proteobacteria; c__Gammaproteobacteria; o__Pseudomonadales; f__Moraxellaceae; g__Acinetobacter; s__Acinetobacter_lwoffii
OTU405	0	0	4	0	0	0	0	0	0	d__Bacteria; p__Bacteroidetes; c__Sphingobacteriia; o__Sphingobacteriales; f__Sphingobacteriaceae
OTU406	0	0	0	0	0	0	0	4	0	d__Bacteria; p__Chloroflexi; c__Thermomicrobia; o__JG30-KF-CM45; f__norank; g__norank; s__uncultured_bacterium
OTU407	2	0	0	8	0	8	18	0	0	d__Bacteria; p__Firmicutes; c__Clostridia; o__Clostridiales; f__Lachnospiraceae
OTU408	0	0	0	0	0	20	0	0	0	d__Bacteria; p__Bacteroidetes; c__Bacteroidia; o__Bacteroidales; f__Bacteroidales_S24-7_group; g__norank; s__uncultured_organism
OTU409	0	0	0	0	0	12	0	0	0	d__Bacteria; p__Bacteroidetes; c__Bacteroidia; o__Bacteroidales; f__Bacteroidales_S24-7_group; g__norank; s__uncultured_bacterium
OTU410	0	3	35	0	0	20	0	3	2	d__Bacteria; p__Actinobacteria; c__Actinobacteria; o__Micrococcales; f__Micrococcaceae
OTU411	0	0	0	1	0	0	0	4	0	d__Bacteria; p__Proteobacteria; c__Alphaproteobacteria; o__Rhizobiales; f__Methylobacteriaceae; g__Microvirga
OTU412	0	3	0	7	0	0	0	0	0	d__Bacteria; p__Firmicutes; c__Clostridia; o__Clostridiales; f__Family_XI; g__Anaerococcus
OTU413	0	6	18	0	0	48	0	0	0	d__Bacteria; p__Actinobacteria; c__Actinobacteria; o__Propionibacteriales; f__Propionibacteriaceae; g__Propioniciclava; s__uncultured_bacterium
OTU414	0	0	0	0	0	154	0	0	0	d__Bacteria; p__Firmicutes; c__Bacilli; o__Lactobacillales; f__Lactobacillaceae; g__Lactobacillus; s__Lactobacillus_murinus
OTU415	0	0	0	0	0	0	3	0	0	d__Bacteria; p__Firmicutes; c__Bacilli; o__Bacillales; f__Paenibacillaceae; g__Paenibacillus
OTU416	0	0	37	0	0	3	12	2	6	d__Bacteria; p__Firmicutes; c__Bacilli; o__Bacillales; f__Staphylococcaceae; g__Jeotgalicoccus; s__uncultured_bacterium
OTU417	0	0	0	0	6	0	0	0	0	d__Bacteria; p__Actinobacteria; c__Actinobacteria; o__Bifidobacteriales; f__Bifidobacteriaceae; g__Bifidobacterium; s__Bifidobacterium_breve
OTU418	0	0	0	0	0	25	0	0	0	d__Bacteria; p__Firmicutes; c__Clostridia; o__Clostridiales; f__Ruminococcaceae; g__Ruminococcus_1
OTU419	0	0	0	0	0	0	3	0	0	d__Bacteria; p__Proteobacteria; c__Gammaproteobacteria; o__Pasteurellales; f__Pasteurellaceae; g__Haemophilus; s__Haemophilus_parainfluenzae
OTU420	0	0	3	0	0	0	0	0	0	d__Bacteria; p__Firmicutes; c__Clostridia; o__Clostridiales; f__Family_XI; g__Gottschalkia; s__uncultured_bacterium
OTU421	0	0	0	0	2	0	0	0	0	d__Bacteria; p__Actinobacteria; c__Actinobacteria; o__Micrococcales; f__Microbacteriaceae; g__Humibacter
OTU422	0	0	0	0	0	8	0	0	0	d__Bacteria; p__Firmicutes; c__Negativicutes; o__Selenomonadales; f__Veillonellaceae; g__Dialister
OTU423	0	0	0	0	0	0	0	1	0	d__Bacteria; p__Actinobacteria; c__Actinobacteria; o__Propionibacteriales; f__Propionibacteriaceae; g__Microlunatus; s__Microlunatus_aurantiacus
OTU424	0	73	781	2	12	2082	13	449	0	d__Bacteria; p__Firmicutes; c__Bacilli; o__Lactobacillales; f__Enterococcaceae; g__Enterococcus
OTU425	0	0	0	0	0	0	0	0	17408	d__Bacteria; p__Cyanobacteria; c__Cyanobacteria; o__norank; f__norank; g__norank; s__Vitis_vinifera_subsp._caucasica
OTU426	77	2	0	22	63	340	0	116	0	d__Bacteria; p__Actinobacteria; c__Actinobacteria; o__Coriobacteriales; f__Coriobacteriaceae; g__Eggerthella
OTU427	0	0	0	0	0	19	0	5	0	d__Bacteria; p__Actinobacteria; c__Actinobacteria; o__Coriobacteriales; f__Coriobacteriaceae; g__Gordonibacter
OTU428	0	0	0	0	0	0	3	0	0	d__Bacteria; p__Bacteroidetes; c__Sphingobacteriia; o__Sphingobacteriales; f__Chitinophagaceae; g__Chitinophaga
OTU429	0	0	8	0	0	0	0	0	0	d__Bacteria; p__Proteobacteria; c__Betaproteobacteria; o__Burkholderiales; f__Alcaligenaceae; g__Pusillimonas
OTU430	0	0	20	0	0	0	0	0	0	d__Bacteria; p__Bacteroidetes; c__Bacteroidia; o__Bacteroidales; f__Porphyromonadaceae; g__Dysgonomonas; s__uncultured_bacterium
OTU431	2	0	0	0	0	0	0	1	0	d__Bacteria; p__Firmicutes; c__Clostridia; o__Clostridiales; f__Ruminococcaceae
OTU432	0	0	0	0	0	0	0	5	0	d__Bacteria; p__Firmicutes; c__Clostridia; o__Clostridiales; f__Peptococcaceae; g__Peptococcus; s__uncultured_organism
OTU433	0	1	0	0	0	4	0	0	0	d__Bacteria; p__Firmicutes; c__Clostridia; o__Clostridiales; f__Peptococcaceae
OTU434	1	0	0	0	0	0	3	0	0	d__Bacteria; p__Firmicutes; c__Clostridia; o__Clostridiales; f__Family_XI; g__Finegoldia; s__uncultured_bacterium
OTU435	0	0	15	0	0	0	0	0	0	d__Bacteria; p__Bacteroidetes; c__Sphingobacteriia; o__Sphingobacteriales; f__Sphingobacteriaceae; g__Sphingobacterium
OTU436	49	6	0	18	96	43	1	21	0	d__Bacteria; p__Firmicutes; c__Clostridia; o__Clostridiales; f__Ruminococcaceae; g__Anaerotruncus; s__Anaerotruncus_colihominis
OTU437	2	0	0	0	0	1	0	1	0	d__Bacteria; p__Firmicutes; c__Clostridia; o__Clostridiales; f__Ruminococcaceae; g__[Eubacterium]_coprostanoligenes_group; s__unidentified
OTU438	0	0	0	0	0	0	0	0	3	d__Bacteria; p__Proteobacteria; c__Betaproteobacteria; o__Burkholderiales; f__Comamonadaceae; g__Pseudorhodoferax; s__uncultured_bacterium
OTU439	0	0	0	0	0	12	0	0	0	d__Bacteria; p__Bacteroidetes; c__Bacteroidia; o__Bacteroidales; f__Bacteroidales_S24-7_group; g__norank; s__uncultured_bacterium
OTU440	0	0	0	0	2	0	0	1	0	d__Bacteria; p__Firmicutes; c__Bacilli; o__Bacillales; f__Paenibacillaceae; g__Paenibacillus
OTU441	0	0	0	1	4	0	5	7	42	d__Bacteria; p__Actinobacteria; c__Actinobacteria; o__Bifidobacteriales; f__Bifidobacteriaceae
OTU442	0	0	0	0	0	5	0	0	0	d__Bacteria; p__Bacteroidetes; c__Bacteroidia; o__Bacteroidales; f__Bacteroidales_S24-7_group; g__norank; s__uncultured_bacterium
OTU443	0	0	0	0	0	12	0	0	0	d__Bacteria; p__Firmicutes; c__Clostridia; o__Clostridiales; f__Lachnospiraceae; g__Lachnospiraceae_NK4A136_group
OTU444	23	0	0	0	0	6	0	2	0	d__Bacteria; p__Firmicutes; c__Clostridia; o__Clostridiales; f__Ruminococcaceae; g__Caproiciproducens
OTU445	4	0	0	0	0	0	0	0	0	d__Bacteria; p__Bacteroidetes; c__Bacteroidia; o__Bacteroidales; f__Bacteroidaceae; g__Bacteroides
OTU446	160	81	0	10	25	14	0	84	0	d__Bacteria; p__Firmicutes; c__Erysipelotrichia; o__Erysipelotrichales; f__Erysipelotrichaceae; g__Faecalitalea
OTU447	0	0	0	0	0	0	0	17	0	d__Bacteria; p__Firmicutes; c__Clostridia; o__Clostridiales; f__Lachnospiraceae
OTU448	0	0	4	0	0	0	1	0	0	d__Bacteria; p__Bacteroidetes; c__Flavobacteriia; o__Flavobacteriales; f__Flavobacteriaceae; g__Flavobacterium; s__uncultured_bacterium
OTU449	0	13	0	2	0	0	0	0	0	d__Bacteria; p__Firmicutes; c__Clostridia; o__Clostridiales; f__Ruminococcaceae; g__Ruminiclostridium_5; s__uncultured_organism
OTU450	0	0	0	0	5	0	0	2	0	d__Bacteria; p__Firmicutes; c__Clostridia; o__Clostridiales; f__Ruminococcaceae
OTU451	0	0	51	0	0	18	1	1	0	d__Bacteria; p__Actinobacteria; c__Actinobacteria; o__Micrococcales
OTU452	3	0	0	0	25	0	0	8	0	d__Bacteria; p__Firmicutes; c__Bacilli; o__Lactobacillales; f__Lactobacillaceae; g__Lactobacillus; s__Lactobacillus_saerimneri
OTU453	0	0	4	0	0	0	0	0	0	d__Bacteria; p__Actinobacteria; c__Actinobacteria; o__Micrococcales; f__Micrococcales_Incertae_Sedis; g__Timonella
OTU454	0	0	0	0	0	3	0	0	0	d__Bacteria; p__Firmicutes; c__Clostridia; o__Clostridiales; f__Ruminococcaceae; g__Oscillibacter; s__uncultured_bacterium
OTU455	0	0	0	0	0	12	0	0	0	d__Bacteria; p__Firmicutes; c__Clostridia; o__Clostridiales; f__Ruminococcaceae; g__Ruminococcaceae_UCG-013; s__uncultured_organism
OTU456	0	14	0	0	2	0	0	266	0	d__Bacteria; p__Firmicutes; c__Negativicutes; o__Selenomonadales; f__Veillonellaceae; g__Veillonella; s__Veillonella_ratti
OTU457	0	0	1881	0	0	21	1	12	0	d__Bacteria; p__Proteobacteria; c__Alphaproteobacteria; o__Rhodobacterales; f__Rhodobacteraceae; g__Paracoccus
OTU458	2	0	0	0	0	0	0	0	0	d__Bacteria; p__Actinobacteria; c__Actinobacteria; o__Coriobacteriales; f__Coriobacteriaceae; g__uncultured
OTU459	10	13	0	5	24	15	0	14	0	d__Bacteria; p__Firmicutes; c__Erysipelotrichia; o__Erysipelotrichales; f__Erysipelotrichaceae; g__Erysipelatoclostridium
OTU460	0	0	0	0	0	0	0	0	2	d__Bacteria; p__Proteobacteria; c__Gammaproteobacteria; o__Oceanospirillales; f__Oceanospirillaceae; g__Pseudohongiella
OTU461	0	0	6	3	0	12	2	0	0	d__Bacteria; p__Firmicutes; c__Clostridia; o__Clostridiales; f__Family_XI; g__Ezakiella; s__[Bacteroides]_coagulans
OTU462	0	3	0	0	0	0	0	8	0	d__Bacteria; p__Firmicutes; c__Clostridia; o__Clostridiales; f__Ruminococcaceae; g__Ruminococcaceae_UCG-008
OTU463	0	0	0	0	2	0	0	0	0	d__Bacteria; p__Acidobacteria; c__Acidobacteria; o__Acidobacteriales; f__Acidobacteriaceae__Subgroup_1_; g__Terriglobus; s__uncultured_bacterium
OTU464	0	0	0	0	0	6	0	0	0	d__Bacteria; p__Bacteroidetes; c__Flavobacteriia; o__Flavobacteriales; f__Flavobacteriaceae; g__Elizabethkingia
OTU465	0	0	113	0	0	0	0	0	0	d__Bacteria; p__Proteobacteria; c__Gammaproteobacteria; o__Pseudomonadales; f__Pseudomonadaceae; g__Pseudomonas
OTU466	98	167	9	33	96	219	1	23	0	d__Bacteria; p__Firmicutes; c__Clostridia; o__Clostridiales; f__Ruminococcaceae; g__Butyricicoccus
OTU467	0	0	0	0	13	0	0	0	0	d__Bacteria; p__Firmicutes; c__Bacilli; o__Bacillales; f__Paenibacillaceae; g__Paenibacillus; s__Paenibacillus_taiwanensis
OTU468	0	0	0	0	0	4	0	0	0	d__Bacteria; p__Firmicutes; c__Bacilli; o__Lactobacillales; f__Carnobacteriaceae; g__Atopostipes
OTU469	115	59	108	43	189	25	15	200	30	d__Bacteria; p__Firmicutes; c__Bacilli; o__Lactobacillales; f__Lactobacillaceae; g__Lactobacillus
OTU470	0	0	3788	0	0	14	21	4	0	d__Bacteria; p__Proteobacteria; c__Alphaproteobacteria; o__Rhizobiales; f__Brucellaceae; g__Paenochrobactrum; s__uncultured_bacterium
OTU471	0	2	0	1	0	0	0	18	0	d__Bacteria; p__Chloroflexi; c__Thermomicrobia; o__JG30-KF-CM45; f__norank; g__norank; s__uncultured_bacterium
OTU472	2	4	620	0	0	72	133	0	0	d__Bacteria; p__Firmicutes; c__Bacilli; o__Bacillales; f__Planococcaceae; g__Solibacillus; s__uncultured_bacterium
OTU473	0	0	0	0	0	0	0	2	1	d__Bacteria; p__Actinobacteria; c__Actinobacteria; o__Micrococcales; f__Micrococcaceae; g__Nesterenkonia
OTU474	2	0	0	0	0	8	0	0	0	d__Bacteria; p__Firmicutes; c__Clostridia; o__Clostridiales; f__Ruminococcaceae; g__Anaerotruncus
OTU475	0	0	0	0	0	6	0	0	0	d__Bacteria; p__Firmicutes; c__Clostridia; o__Clostridiales; f__Ruminococcaceae; g__Ruminococcaceae_UCG-013; s__uncultured_rumen_bacterium
OTU476	0	5	1	0	0	0	7	127	0	d__Bacteria; p__Firmicutes; c__Bacilli; o__Lactobacillales; f__Streptococcaceae; g__Streptococcus; s__Streptococcus_gallolyticus_subsp._macedonicus
OTU477	0	0	22	0	0	0	0	0	0	d__Bacteria; p__Proteobacteria; c__Deltaproteobacteria; o__Bdellovibrionales; f__Bacteriovoracaceae; g__Peredibacter
OTU478	0	0	46	0	0	0	0	0	0	d__Bacteria; p__Bacteroidetes; c__Flavobacteriia; o__Flavobacteriales; f__Flavobacteriaceae; g__Myroides; s__uncultured_bacterium
OTU479	0	0	0	0	67	0	0	21	0	d__Bacteria; p__Actinobacteria; c__Actinobacteria; o__Coriobacteriales; f__Coriobacteriaceae; g__Collinsella
OTU481	0	0	0	0	0	0	0	2	0	d__Bacteria; p__Firmicutes; c__Clostridia; o__Clostridiales; f__Lachnospiraceae; g__norank; s__Clostridiaceae_bacterium_BARN-424-CC-10
OTU482	0	0	7	0	2	0	2	0	0	d__Bacteria; p__Proteobacteria; c__Alphaproteobacteria; o__Sphingomonadales; f__Sphingomonadaceae; g__Sphingomonas
OTU483	0	0	9	0	0	0	0	0	0	d__Bacteria; p__Proteobacteria; c__Alphaproteobacteria; o__Rhizobiales; f__Beijerinckiaceae; g__Camelimonas; s__uncultured_bacterium
OTU484	0	0	0	0	0	0	0	1	0	d__Bacteria; p__Firmicutes; c__Clostridia; o__Clostridiales; f__Christensenellaceae
OTU485	0	0	0	0	0	3	0	0	0	d__Bacteria; p__Firmicutes; c__Clostridia; o__Clostridiales; f__Lachnospiraceae; g__Tyzzerella_3; s__[Clostridium]_colinum
OTU486	0	0	26	0	0	0	0	0	0	d__Bacteria; p__Firmicutes; c__Bacilli; o__Bacillales; f__Paenibacillaceae; g__Paenibacillus
OTU487	0	0	0	0	0	7	0	0	0	d__Bacteria; p__Firmicutes; c__Clostridia; o__Clostridiales; f__Ruminococcaceae; g__Ruminiclostridium_9; s__uncultured_bacterium
OTU488	0	0	0	0	0	0	0	2	0	d__Bacteria; p__Actinobacteria; c__Actinobacteria; o__Corynebacteriales; f__Corynebacteriaceae; g__Corynebacterium_1
OTU489	0	9	0	0	0	0	9	0	0	d__Bacteria; p__Proteobacteria; c__Gammaproteobacteria; o__Enterobacteriales; f__Enterobacteriaceae; g__Providencia; s__Providencia_alcalifaciens
OTU490	0	0	0	0	0	13	0	0	0	d__Bacteria; p__Actinobacteria; c__Actinobacteria; o__Micrococcales; f__Micrococcaceae; g__Rothia
OTU491	0	0	14	0	0	0	2	0	0	d__Bacteria; p__Saccharibacteria; c__norank; o__norank; f__norank; g__norank; s__uncultured_bacterium
OTU492	17	6	0	2	12	13	0	9	0	d__Bacteria; p__Firmicutes; c__Clostridia; o__Clostridiales; f__Ruminococcaceae; g__Anaerotruncus; s__uncultured_bacterium
OTU493	25	3	0	3	9	10	0	5	0	d__Bacteria; p__Firmicutes; c__Clostridia; o__Clostridiales; f__Ruminococcaceae; g__Anaerotruncus; s__uncultured_bacterium
OTU494	5	0	0	0	3	11	0	1	0	d__Bacteria; p__Firmicutes; c__Negativicutes; o__Selenomonadales; f__Veillonellaceae; g__uncultured; s__uncultured_organism
OTU495	0	0	0	0	0	12	0	0	0	d__Bacteria; p__Bacteroidetes; c__Bacteroidia; o__Bacteroidales; f__Bacteroidales_S24-7_group; g__norank; s__uncultured_bacterium
OTU496	43	85	0	5	0	0	0	0	0	d__Bacteria; p__Firmicutes; c__Clostridia; o__Clostridiales; f__Ruminococcaceae
OTU497	24	37	7	43	75	62	39	40	0	d__Bacteria; p__Firmicutes; c__Clostridia; o__Clostridiales; f__Lachnospiraceae; g__Cellulosilyticum; s__uncultured_Cellulosilyticum_sp.
OTU498	0	0	228	0	0	0	1	0	0	d__Bacteria; p__Proteobacteria; c__Betaproteobacteria; o__Burkholderiales; f__Alcaligenaceae; g__Alcaligenes; s__Alcaligenes_faecalis
OTU499	146	253	11	34	116	160	11	40	0	d__Bacteria; p__Firmicutes; c__Clostridia; o__Clostridiales; f__Lachnospiraceae; g__Anaerosporobacter; s__uncultured_bacterium
OTU500	89	29	0	0	0	137	0	33	0	d__Bacteria; p__Firmicutes; c__Clostridia; o__Clostridiales; f__Family_XIII; g__[Eubacterium]_nodatum_group
OTU501	0	0	0	0	13	0	0	0	0	d__Bacteria; p__Chloroflexi; c__Thermomicrobia; o__JG30-KF-CM45; f__norank; g__norank; s__uncultured_bacterium
OTU502	0	0	0	0	0	0	0	4	0	d__Bacteria; p__Actinobacteria; c__Actinobacteria; o__Micromonosporales; f__Micromonosporaceae; g__Stackebrandtia; s__uncultured_bacterium
OTU503	0	0	20	0	0	0	7	0	0	d__Bacteria; p__Proteobacteria; c__Betaproteobacteria; o__Burkholderiales; f__Comamonadaceae; g__Lampropedia; s__Lampropedia_hyalina
OTU504	335	726	34	84	1135	270	73	797	6	d__Bacteria; p__Firmicutes; c__Clostridia; o__Clostridiales; f__Clostridiaceae_1; g__Clostridium_sensu_stricto_2; s__uncultured_organism
OTU505	8	17	0	0	0	2	2	41	0	d__Bacteria; p__Firmicutes; c__Clostridia; o__Clostridiales; f__Lachnospiraceae
OTU506	0	0	0	0	0	0	0	2	0	d__Bacteria; p__Actinobacteria; c__Actinobacteria; o__Micromonosporales; f__Micromonosporaceae; g__Stackebrandtia; s__uncultured_bacterium
OTU507	45	133	0	19	363	28	229	50	1	d__Bacteria; p__Firmicutes; c__Clostridia; o__Clostridiales; f__Clostridiaceae_1; g__Clostridium_sensu_stricto_1
OTU508	0	0	0	1	0	0	0	7	0	d__Bacteria; p__Actinobacteria; c__Actinobacteria; o__Streptosporangiales; f__Nocardiopsaceae; g__Nocardiopsis; s__Nocardiopsis_salina
OTU509	7	151	0	159	71	2	43	96	14	d__Bacteria; p__Firmicutes; c__Bacilli; o__Bacillales; f__Staphylococcaceae; g__Staphylococcus; s__Staphylococcus_simulans
OTU511	0	0	23	0	0	0	0	0	0	d__Bacteria; p__Proteobacteria; c__Betaproteobacteria; o__Burkholderiales; f__Alcaligenaceae; g__Paenalcaligenes; s__uncultured_prokaryote
OTU512	0	0	4	0	1	0	0	0	0	d__Bacteria; p__Bacteroidetes; c__Flavobacteriia; o__Flavobacteriales; f__Flavobacteriaceae; g__Chryseobacterium; s__Chryseobacterium_anthropi
OTU513	0	0	914	0	0	0	0	0	0	d__Bacteria; p__Actinobacteria; c__Actinobacteria; o__Micrococcales; f__Micrococcales_Incertae_Sedis; g__Timonella; s__uncultured_bacterium
OTU514	74	55	0	8	22	19	1	16	0	d__Bacteria; p__Firmicutes; c__Erysipelotrichia; o__Erysipelotrichales; f__Erysipelotrichaceae; g__Holdemania
OTU515	5	5	0	0	0	95	0	3	0	d__Bacteria; p__Firmicutes; c__Clostridia; o__Clostridiales; f__Ruminococcaceae; g__Ruminococcaceae_UCG-013; s__uncultured_bacterium
OTU516	2	6	0	0	1	0	0	2	0	d__Bacteria; p__Firmicutes; c__Clostridia; o__Clostridiales; f__Ruminococcaceae
OTU517	0	0	0	0	12	0	0	2	0	d__Bacteria; p__Firmicutes; c__Clostridia; o__Clostridiales; f__Ruminococcaceae
OTU518	0	0	0	0	0	0	3	0	0	d__Bacteria; p__Proteobacteria; c__Alphaproteobacteria; o__Sphingomonadales; f__Sphingomonadaceae; g__Zymomonas
OTU519	7	1	0	0	0	22	0	1	0	d__Bacteria; p__Firmicutes; c__Clostridia; o__Clostridiales; f__Ruminococcaceae
OTU520	0	0	0	0	0	496	0	1	0	d__Bacteria; p__Firmicutes; c__Bacilli; o__Lactobacillales; f__Lactobacillaceae; g__Lactobacillus; s__Lactobacillus_johnsonii
OTU521	2	0	0	1	12	0	0	3	0	d__Bacteria; p__Firmicutes; c__Clostridia; o__Clostridiales
OTU522	0	0	0	0	4	0	0	0	0	d__Bacteria; p__Proteobacteria; c__Betaproteobacteria; o__Burkholderiales; f__Comamonadaceae; g__Acidovorax
OTU523	21	5	0	0	167	188	0	14	0	d__Bacteria; p__Firmicutes; c__Negativicutes; o__Selenomonadales; f__Veillonellaceae
OTU524	0	0	0	0	4	0	0	0	0	d__Bacteria; p__Firmicutes; c__Erysipelotrichia; o__Erysipelotrichales; f__Erysipelotrichaceae; g__Candidatus_Stoquefichus
OTU525	0	0	31	0	0	0	0	0	0	d__Bacteria; p__Firmicutes; c__Bacilli; o__Bacillales; f__Bacillaceae; g__Bacillus; s__Bacillus_anthracis
OTU526	0	0	23	0	0	0	0	0	0	d__Bacteria; p__Proteobacteria; c__Gammaproteobacteria; o__Pseudomonadales; f__Pseudomonadaceae; g__Pseudomonas
OTU527	0	0	72	0	0	0	4	0	0	d__Bacteria; p__Bacteroidetes; c__Flavobacteriia; o__Flavobacteriales; f__Flavobacteriaceae; g__Flavobacterium; s__uncultured_bacterium
OTU528	1101	4086	341	3448	2007	2051	3907	2046	29	d__Bacteria; p__Firmicutes; c__Clostridia; o__Clostridiales; f__Lachnospiraceae; g__Epulopiscium; s__uncultured_organism
OTU529	0	0	0	0	0	0	0	1	0	d__Bacteria; p__Actinobacteria; c__Actinobacteria; o__Micrococcales; f__Brevibacteriaceae; g__Brevibacterium
OTU530	83	540	24	41	40	146	202	49	17	d__Bacteria; p__Firmicutes; c__Erysipelotrichia; o__Erysipelotrichales; f__Erysipelotrichaceae; g__Turicibacter; s__uncultured_bacterium
OTU531	0	0	0	0	2	0	0	0	0	d__Bacteria; p__Proteobacteria; c__Alphaproteobacteria; o__Rhodospirillales; f__Acetobacteraceae; g__uncultured; s__unidentified
OTU532	23	1	0	0	28	3	0	16	0	d__Bacteria; p__Firmicutes; c__Clostridia; o__Clostridiales; f__Ruminococcaceae; g__Anaerotruncus
OTU533	0	1	59	1	8	4	5	6	0	d__Bacteria; p__Actinobacteria; c__Actinobacteria; o__Micrococcales; f__Microbacteriaceae; g__Microbacterium
OTU534	74	55	9	32	24	10	7	46	0	d__Bacteria; p__Firmicutes; c__Erysipelotrichia; o__Erysipelotrichales; f__Erysipelotrichaceae; g__Erysipelatoclostridium; s__Erysipelatoclostridium_ramosum
OTU535	0	0	0	0	0	0	0	1	0	d__Bacteria; p__Chloroflexi; c__Thermomicrobia; o__JG30-KF-CM45; f__norank; g__norank; s__uncultured_bacterium
OTU536	1	4	0	0	0	0	0	0	0	d__Bacteria; p__Firmicutes; c__Clostridia; o__Clostridiales; f__Ruminococcaceae; g__Anaerotruncus
